# Supplementary material for: An integrative framework to reevaluate the Neotropical catfish genus Guyanancistrus (Siluriformes: Loricariidae) with particular emphasis on the Guyanancistrus brevispinis complex
Source: PLoS One. 2018 Jan 3;13(1):e0189789. doi: 10.1371/journal.pone.0189789 (PMC5752014; doi:10.1371/journal.pone.0189789)
Supplement: S1 Table — Measurements are in mm. Variables labelled as in Tables 4 and 5, and species, populations, and morphs labelled as in Fig 1. (XLSX) [file pone.0189789.s002.xlsx]

## Sheet: Feuil1
species	Type status	morph	abbreviation	locality	catalog number	field number	LS	L_pred	LT	museau	hauteur	larg.scl	largeur	interorb	internostr	orb	op	isthme	mand	max	ep.D	base_D	interd	ep.ad.	anale	ep.P	ep.V	L_thor	L_abd	L_ped.C	H_ped.C	ep.sup.C	ep.inf.C	larg.base_D	md	mx	D	P	V	A	C	l.lat.	pd	pdbis	so	bd	id	ac	d.a
Guyanancistrus brevispinis brevispinis			GbKab	SU, Moi Moi creek, Kabalebo, Corantijne	MHNG 2736.039		29.79	13.38	11.19	6.46	4.74	8.35	9.74	3.42	1.48	2.18	2.01	7.01	1.89	2.2	6.68	6.95	4.51	2.7	2.87	8.06	7.19	7.15	6.45	8.6	3.27	7.88	10.35	7.45	25	27	7	6	5	5	14	24	3	1	3	7	6	7	1.5
Guyanancistrus brevispinis brevispinis			GbKab	SU, Moi Moi creek, Kabalebo, Corantijne	MHNG 2736.039		37.36	16.95	13.79	8.38	5.98	10.64	12.13	4.32	1.6	2.61	2.43	8.29	2.68	2.63	8.91	8.93	6.54	3.58	3.74	10.02	9.42	9.11	8.64	10.77	3.98	8.89	11.78	9.89	45	44	7	6	5	5	14	24	3	1	3	7	7	6	2
Guyanancistrus brevispinis brevispinis			GbKab	SU, Moi Moi creek, Kabalebo, Corantijne	MHNG 2736.039	GFSU12-442	53.84	22.49	18.39	11.48	8.61	15.15	17.17	5.94	1.85	3.48	2.96	11.72	4.01	3.94	12.65	13.3	9.34	5.7	4.7	15.72	13.32	12.73	12.08	15.55	5.67	12.97	18.46	14.72	47	55	7	6	5	5	14	24	3	1	3	7	7	6	2
Guyanancistrus brevispinis brevispinis			GbKab	SU, Moi Moi creek, Kabalebo, Corantijne	MHNG 2736.039		62.84	26.29	21.36	13.1	9.5	17.16	19.7	6.81	1.93	4.04	3.53	13.97	4.42	4.7	15.2	15.31	12.02	5.91	5.81	18.53	15.16	14.73	15.12	18.99	6.12	15.87	21.45	16.46	47	49	7	6	5	5	14	24	3	1	3	7	6	7	2.5
Guyanancistrus brevispinis brevispinis			GbKab	SU, Moi Moi creek, Kabalebo, Corantijne	MHNG 2736.039	GFSU12-447	66.43	28.34	22.65	14.23	10.5	18.57	21.53	7.75	2.41	4	3.63	14.38	4.78	5.19	16.32	16.48	12.08	6.42	6.11	19.43	16.33	16.19	15.45	20.19	7.18	16.8	23.07	18.2	46	48	7	6	5	5	14	23	3	1	3	7	6	7	2.5
Guyanancistrus brevispinis brevispinis			GbKab	SU, Moi Moi creek, Kabalebo, Corantijne	MHNG 2736.039		78.8	32.34	25.12	16.08	11.97	21.24	24.36	9.12	2.75	4.39	4.15	17.68	5.11	5.8	18	19.11	13.89	6.56	8.3	22.78	18.33	19.13	18.91	22.67	8.05	20.2508	24.63	20.11	42	40	7	6	5	5	14	24	3	1	3	7	7	6	3
Guyanancistrus brevispinis brevispinis			GbKab	SU, Moi Moi creek, Kabalebo, Corantijne	MHNG 2736.039		35.27	15.45	12.94	7.63	5.6	9.59	10.54	4.3	1.57	2.32	2.2	8.01	2.25	2.36	8.36828	8.06	5.46	2.66	3.35	9.70965	8.70885	8.76	7.77	10.52	3.65	8.54651	11.7722	8.81	46	38	7	6	5	5	14	23	3	1	3	8	6	6	2
Guyanancistrus brevispinis brevispinis			GbKab	SU, Moi Moi creek, Kabalebo, Corantijne	MHNG 2736.039		42.68	18.7	14.82	9.35	7.04	11.41	13.46	4.79	1.8	2.87	3.01	9.35	2.6	2.98	9.3	10.3	7.06	3.59	3.64	11.29	9.5	10.27	9.42	12.07	4.58	10.5389	12.77	11.08	41	45	7	6	5	5	14	24	3	1	3	7	6	7	1
Guyanancistrus brevispinis brevispinis			GbKab	SU, Moi Moi creek, Kabalebo, Corantijne	MHNG 2736.039		50.79	22.49	18.37	11.15	8.27	13.6	15.99	6.06	2.08	3.4	3.66	12.14	3.59	3.45	11.69	11.84	8.27	5.06	4.36	14.92	13.31	12.6	11.8	14.89	5.37	11.92	16.92	12.39	40	48	7	6	5	5	14	24	3	1	3	7	6	7	2
Guyanancistrus brevispinis brevispinis			GbKab	SU, Moi Moi creek, Kabalebo, Corantijne	MHNG 2736.039	GFSU12-441	58.82	26.51	20.83	13.82	9.75	17.31	18.53	7.08	2.3	3.93	3.85	14	4.06	4.06	13.76	14.74	10.69	5.77	5.42	17.99	15.2	14.02	13.5	17.78	6.45	15.5	18.54	16.09	54	50	7	6	5	5	14	24	3	1	3	7	7	6	3
Guyanancistrus brevispinis brevispinis			GbKab	SU, Moi Moi creek, Kabalebo, Corantijne	MHNG 2736.039		75.12	32.81	25.5	16.04	11.74	20.12	23.35	8.74	2.91	4.45	4.68	16.36	5.07	5.42	17.91	18.01	13.76	6.76	7.65	22.58	18.31	17.5	17.15	22.45	7.65	19.2613	24.2447	19.65	38	44	7	6	5	5	14	24	3	1	3	8	6	7	2.5
Guyanancistrus brevispinis brevispinis			GbKab	SU, Moi Moi creek, Kabalebo, Corantijne	MHNG 2736.039		87.71	38.82	29.4	19.25	13.27	23.5	27.06	10.2	3.34	4.84	5.48	19.14	6.31	6	18.4	21.31	15	7.87	9.75	25.88	21.71	20.95	21.14	24.95	8.95	23.02	27.47	22.8	29	27	7	6	5	5	14	23	3	1	3	7	6	6	2
Guyanancistrus brevispinis brevispinis			GbCor	SU, Sipaliwini R., haute Corantijne	MHNG 2704.010		32.28	14.66	11.96	6.78	5.44	8.73	10.29	3.7	1.39	2.27	1.93	7.22	2.05	2.24	7.64	7.88	5.19	3.45	3.14	8.27	7.33	7.12	7.48	9.6	3.33	7.79	10.88	8.65	34	37	7	6	5	5	14	23	2	1	3	7	6	7	1.5
Guyanancistrus brevispinis brevispinis			GbCor	SU, Sipaliwini R., haute Corantijne	MHNG 2704.010		40.66	17.62	14.68	8.77	6.47	11.24	12.74	4.51	1.89	2.8	2.38	9.15	2.74	2.73	9.91709	9.8	6.9	4.4	3.74	11.0752	9.97	9.3	9.1	12.38	4.18	9.8145	14.03	11.42	47	40	7	6	5	5	14	25	3	1	3	7	7	7	2
Guyanancistrus brevispinis brevispinis			GbCor	SU, Sipaliwini R., haute Corantijne	MHNG 2704.010		59.62	24.79	20.9	13.02	9.59	16.84	19.05	6.39	2.17	3.76	3.58	14.05	4.08	4.44	14.14	14.46	11.33	5.84	5.52	17.3	15.05	13.72	14.14	18.27	6.2	13.5	18.9043	16.87	57	50	7	6	5	5	14	24	3	1	3	7	7	6	2
Guyanancistrus brevispinis brevispinis			GbCor	SU, Sipaliwini R., haute Corantijne	MHNG 2704.010		75.9	31.28	24.92	15.45	11.95	20.46	23.73	7.94	3	4.52	4.56	16.36	4.98	5.32	17.84	18.78	15.22	5.95	7.7	21.25	19.06	17.9	17.9	22.14	8.02	17.81	23.7484	21.5	44	47	7	6	5	5	14	24	2	1	3	7	7	6	2.5
Guyanancistrus brevispinis brevispinis			GbCor	SU, Sipaliwini R., haute Corantijne	MHNG 2704.010		93.39	38.99	30.46	19.16	14.81	26.5	30.2	10.03	3.57	5.5	5.27	20.88	6.74	6.78	23.07	23.97	16.02	8.76	8.95	28.67	23.44	22.13	23.52	27.68	9.77	22.63	28.58	28.04	56	50	7	6	5	5	14	24	3	1	3	7	6	6	1
Guyanancistrus brevispinis brevispinis			GbCor	SU, Sipaliwini R., haute Corantijne	MHNG 2704.010		122.58	49	38.76	25.53	19.91	35.51	39.06	13.81	4.33	6.37	6.37	27.3	9.15	8.35	28.99	30.99	21.55	11.52	14.96	40.58	29.27	30.14	29.62	36.31	13.05	30.0755	39.13	35.42	64	65	7	6	5	5	14	24	3	1	3	7	6	7	0.5
Guyanancistrus brevispinis brevispinis			GbCor	SU, Manicouni R., haute Corantijn	MHNG 2704.008		39.27	17.18	14.33	8.41	6.2	10.73	12.04	4.46	1.55	2.59	2.54	8.71	2.43	2.63	9.23	9.23	6.21	3.55	3.95	10.81	10.18	9.45	9.16	11.18	3.95	9.7	13.19	10.23	39	40	7	6	5	5	14	24	3	1	3	7	6	6	1
Guyanancistrus brevispinis brevispinis			GbCor	SU, Manicouni R., haute Corantijn	MHNG 2704.008	SU07-598	49.89	22.44	17.7	10.76	8.07	13.92	15.5	5.84	2.11	3.21	2.92	9.63	3.5	3.52	12.8	11.63	8.13	5.45	4.82	14.95	12.77	11.75	11.51	15.45	5.35	12.85	15.03	12.41	49	44	7	6	5	5	14	24	3	1	3	8	6	6	1.5
Guyanancistrus brevispinis brevispinis			GbCor	SU, Manicouni R., haute Corantijn	MHNG 2704.008	SU07-597	59.87	24.82	20.79	12.84	9.77	16.5	18.33	6.94	2.84	3.61	3.11	14.29	4.68	4.26	15.06	14.19	10.8	5.77	6.49	18.17	14.3	14.04	14.1	17.87	6.54	15.4	20.37	16.28	54	53	7	6	5	5	14	23	3	1	3	7	6	6	1.5
Guyanancistrus brevispinis brevispinis			GbCor	SU, Manicouni R., haute Corantijn	MHNG 2704.008	SU07-595	76.58	32.92	26.58	17.05	12.48	21.85	22.6	8.87	3.05	4.78	4.31	17.26	6.09	5.25	18.14	18.5	13.78	7.94	7.55	24.28	19.05	18.16	19.06	23.47	8.22	17.84	22.44	20.77	57	63	7	6	5	5	14	23	3	1	3	8	6	6	2
Guyanancistrus brevispinis brevispinis			GbCor	SU, Manicouni R., haute Corantijn	MHNG 2704.008	SU07-593	93.43	37.72	30.34	19	14.48	25.09	28.89	10.47	4.13	5.14	5.7	21.79	6.51	6.95	22.51	23	18.37	9.36	9.35	28.92	21.7	21.55	24.05	27.1	10.14	21.9	27.62	26.25	65	65	7	6	5	5	14	23	3	1	3	8	5	6	2
Guyanancistrus brevispinis brevispinis			GbCor	SU, Manicouni R., haute Corantijn	MHNG 2704.008	SU07-586	101.33	42.92	33.44	20.81	15.56	28.33	30.67	11.99	4.32	5.5	5.73	21.5	6.78	6.88	24.52	25.06	19.27	9.91	11.9	31.22	24.45	23.7	25.3	29.83	10.89	26.73	31.42	27.21	62	54	7	6	5	5	14	23	3	1	3	8	6	6	1.5
Guyanancistrus brevispinis brevispinis			GbNick	SU, Bakhuis Mt, Nickerie	MHNG 2722.044	SU01-402	26.15	12.05	10.1	5.65	4.84	7.16	8.29	3.06	1.28	1.92	1.73	6.33	1.73	1.68	6.80933	6.02	4.51	2.32	2.6	5.40728	6.55109	5.71	5.82	7.25	2.72	7.72455	10.06	6.56	32	27	7	6	5	5	14	23	3	1	3	8	6	6	1.38
Guyanancistrus brevispinis brevispinis			GbNick	SU, Bakhuis Mt, Nickerie	MHNG 2722.051	SU01-423	28.98	13.63	11.47	6.74	5.06	8.4	9.63	3.35	1.5	2.22	2.14	7.22	2.12	2.07	7.54325	7.04	4.81	2.62556	2.92	6.46908	7.29595	6.54	6.74	8.52	3.16	8.37677	10.9092	7.41	32	32	7	6	5	5	14	24	2	1	3	8	6	6	1.38
Guyanancistrus brevispinis brevispinis			GbNick	SU, Bakhuis Mt, Nickerie	MHNG 2722.041	SU01-394	38.68	17.28	14.04	8.15	6.27	10.7	12.39	4.44	1.62	2.56	2.84	9.42	2.5	2.84	10.0588	9.35	6.79	3.84	3.48	10.1085	9.46	8.52	8.88	11.27	4.02	10.6123	13.8187	9.97	40	43	7	6	5	5	14	24	2	1	3	8	6	6	1.38
Guyanancistrus brevispinis brevispinis			GbNick	SU, Bakhuis Mt, Nickerie	MHNG 2722.055	SU01-427	39.42	17.08	14.3	8.35	6.16	10.75	12.27	4.36	1.63	2.75	2.15	8.49	2.51	2.42	9.43	8.79	6.67	3.51	4.13	9.49	10.21	9.37	8.85	11.23	3.82	10.48	14.0406	10.11	37	35	7	6	5	5	14	25	3	1	3	7	6	7	2
Guyanancistrus brevispinis brevispinis			GbNick	SU, Bakhuis Mt, Nickerie	MHNG 2722.044	SU01-401	41.05	18.5	15.22	9.06	7.07	11.97	13.48	4.89	1.48	3.17	2.4	10.04	2.69	3.07	10.24	10.32	7.16	4	4.41	10.9977	10.42	8.9	9.5	11.58	4.13	11.29	14.53	11.62	45	44	7	6	5	5	14	24	2	1	3	7	6	6	2
Guyanancistrus brevispinis brevispinis	P		GbNick	SU, Fallawatra River, Nickerie	ZMA 106.478		56.5	24.2	19.2	12.0421	10.1	16.7	18.4	6.6	1.7	3.8	3.7	13.1	3.4	3.4	15.3	13.7	9.6	5.2	5.9	17.4	14.8	13.3	12.7	16.4	6.2	14.7191	19.1637	15.2	50	46	7	6	5	5	14	24	2	1	3	7	6	7	1.5
Guyanancistrus brevispinis brevispinis	P		GbNick	SU, Fallawatra River, Nickerie	MHNG 2108.15		61.07	26.71	21.5	13.06	10.73	18.1	20.5	7.41	2.12	3.86	3.83	14.72	3.39	3.64	15.8652	15.96	11.64	5.77	6.72	19.4	15.69	14.57	14.6	17.52	6.44	15.7724	19.1637	17.63	45	39	7	6	5	5	14	24	3	1	3	8	6	6	1.5
Guyanancistrus brevispinis brevispinis	P		GbNick	SU, Fallawatra River, Nickerie	ZMA 106.478		89.1	39	29.4	18	16.2	25.6	29.5	10.3	2.75	5.2	4.8	19.4	5.8	5.8	22.7	22.3	17.6	4.9	8.9	27.9	22.8	22.7	21.7	25	9.9	22.2323	28.9419	26.8	56	50	7	6	5	5	14	24	3	1	3	8	5	7	1
Guyanancistrus brevispinis brevispinis	P		GbNick	SU, Fallawatra River, Nickerie	MHNG 2108.14		89.1	38.33	30.05	18.54	15.87	26.81	30.48	10.41	2.69	5.18	5.83	20.25	5.29	5.69	24.69	23.6	17.06	8.1	10.73	29.58	23.76	21.87	21.21	25.77	10.09	22.64	28.9419	26.63	53	52	7	6	5	5	14	24	3	1	3	7	7	6	1
Guyanancistrus brevispinis brevispinis	P		GbNick	SU, Fallawatra River, Nickerie	ZMA 106.478		123.3	53.3	40.2	26.95	24.2	36.1	40	14.3	4	6.45	6.2	28.3	7.6	7.6	32.2	31.4	24	11.7	17.2	41.4	31.2	28.8	32.3	34.75	13.8	30.1142	39.2	36	55	55	7	6	5	5	14	24	3	1	3	7	6	7	0.5
Guyanancistrus brevispinis brevispinis	H		GbNick	SU, Fallawatra River, Nickerie	ZMA 107.740		126	53.5	40.6	26.4	22.6	35.4	41.3	14.2	3.8	6.4	6.5	29	8	8	31.4	31.7	27	11.1	15.9	43.3	33.5	28.6	31.05	36	13.9	30.5	40.0099	36.5	73	61	7	6	5	5	14	24	3	1	3	7	8	7	1.5
Guyanancistrus brevispinis brevispinis			GbNick	SU, Moses Creek, Nickerie	MHNG 2753.091	GFSU14-1091	29.26	12.89	10.88	6.07	5.18	8.45	9.44	3.38	1.09	2.3	1.95	6.77	1.8	1.85	6.89	6.59	4.72	2.42	3.01	7.87	7.15	7.12	6.88	8.52	3.03	6.59	9.16971	8.39	36	35	7	6	5	5	14	23	3	1	3	7	6	6	1.5
Guyanancistrus brevispinis brevispinis			GbNick	SU, Moses Creek, Nickerie	MHNG 2753.091		31	13.77	11.36	6.47	5.36	8.61	9.92	3.45	1.17	2.36	1.95	6.95	2.08	2.16	7.41	7.67	4.92	3.14	3.22	8.58	7.86	7.51	6.67	8.81	3.24	7.19	10.18	8.09	41	38	7	6	5	5	14	24	2	1	3	7	7	6	1.5
Guyanancistrus brevispinis brevispinis			GbNick	SU, Moses Creek, Nickerie	MHNG 2753.091		33.23	14.69	12.47	6.74	5.71	9.32	10.75	3.77	1.56	2.63	2.46	7.43	2.05	2.2	8.2	7.94	5.13	3.43	3.23	9.19	8.3	7.25	7.81	9.17	3.47	8.72	11.36	9.17	40	39	7	6	5	5	14	24	2	1	3	7	6	7	2
Guyanancistrus brevispinis brevispinis			GbNick	SU, Moses Creek, Nickerie	MHNG 2753.091	GFSU14-1003	36.1	15.79	13.01	7.34	5.93	10.18	11.79	4	1.13	2.68	2.31	8.52	2.35	2.28	9.04	8.64	6.45	3.63	3.52	10.19	8.33	8.22	8.17	10.63	3.59	8.64354	10.2	9.52	38	43	7	6	5	5	14	24	3	1	3	7	7	6	2
Guyanancistrus brevispinis brevispinis			GbNick	SU, Moses Creek, Nickerie	MHNG 2753.091	GFSU14-1001	36.2	15.95	13.29	7.69	6.23	10.41	11.94	4.32	1.49	2.79	2.52	8.71	2.26	2.45	10.03	8.83	6.32	3.53	3.74	10.12	8.53	8.97	8.26	10.12	3.88	8.94	10.21	10.21	39	46	7	6	5	5	14	24	2	1	3	7	7	6	1.5
Guyanancistrus brevispinis brevispinis			GbNick	SU, Moses Creek, Nickerie	MHNG 2753.091		52.84	22.59	18.45	10.73	8.35	15.34	16.65	5.78	2.02	3.72	3.27	12.55	3.56	3.52	13.19	12.22	9.29	5.26	5.01	15.38	12.74	12.61	12.72	15.97	5.42	12.4666	17.36	15.79	52	50	7	6	5	5	14	24	3	1	3	7	7	6	2
Guyanancistrus brevispinis brevispinis			GbNick	SU, Moses Creek, Nickerie	MHNG 2753.091		62.75	26.64	21.07	12.92	10.26	17.63	20.02	7.02	2.03	4.03	3.79	14.13	3.91	3.55	16.39	15.69	11.63	5.94	5.8	18.2	14.98	14.28	15.64	18.17	6.43	15.14	19.5041	17.7	59	53	7	6	5	5	14	24	3	1	3	7	6	7	1
Guyanancistrus brevispinis brevispinis			GbNick	SU, Moses Creek, Nickerie	MHNG 2753.091	GFSU14-999	63.79	27.52	21.42	13.02	11.12	18.67	20.54	7.53	2.42	4.17	3.88	14.9	4.13	4.29	16.55	16.06	11.58	6.45	5.9	19.43	15.68	14.38	15.19	19.09	6.57	14.42	21.43	17.89	58	67	7	6	5	5	14	24	3	1	3	7	6	7	1.5
Guyanancistrus brevispinis brevispinis			GbNick	SU, Moses Creek, Nickerie	MHNG 2753.091	GFSU14-1089	64.34	27.17	21.65	12.81	10.31	18.87	20.54	7.33	2.16	4.2	3.92	14.88	4.16	3.84	16.6	17.2	11.75	6.39	6.2	19	14.59	15.93	15.93	18.99	7.13	14.56	18.33	18.16	55	55	7	6	5	5	14	24	3	1	3	8	6	6	2
Guyanancistrus brevispinis brevispinis			GbNick	SU, Moses Creek, Nickerie	MHNG 2753.091	GFSU14-998	75.68	31.26	25.08	15.04	12.91	21.96	24.72	8.88	2.63	4.63	4.35	17.24	4.91	4.91	19.6	18.63	13.85	7.48	8.07	23.66	18.47	17.69	18.42	22.85	8.38	18.62	24.82	22.72	60	56	7	6	5	5	14	24	3	1	3	8	5	7	1
Guyanancistrus brevispinis brevispinis			GbNick	SU, Moses Creek, Nickerie	MHNG 2753.091		77.12	33.07	26.21	15.48	13.15	22.46	24.61	9.01	2.36	5.01	4.36	17.69	4.89	4.92	20.42	18.55	14.12	7.41	7.5	22.77	18.9	18	18.13	21.89	7.94	18.26	24.36	21.17	67	64	7	6	5	5	14	24	3	1	3	7	6	7	1.5
Guyanancistrus brevispinis brevispinis			GbNick	SU, Moses Creek, Nickerie	MHNG 2753.091		77.64	32.66	25.51	15.45	12.86	22.21	25.4	8.6	2.74	4.84	4.84	16.72	4.96	4.66	19.16	18	14.21	7.04	7.02	23.12	18.04	18.45	17.66	21.71	7.91	17.39	22.24	21.67	58	62	7	6	5	5	14	24	3	1	3	7	6	7	2
Guyanancistrus brevispinis brevispinis			GbSar	SU, Latambo Creek, Saramacca	MHNG 2758.058	GFSU14-1626 (1)	23.83	10.81	9.28	4.91	4.17	6.5	7.33	2.92	1.24	1.96	1.61	5.23	1.56	1.61	5.53	5.28	3.92	2.29	2.37	6	5.73	5.31	4.82	6.66	2.48	6.24	8.3	6.14	29	34	7	6	5	5	14	23	3	1	3	7	6	6	2
Guyanancistrus brevispinis brevispinis			GbSar	SU, Latambo Creek, Saramacca	MHNG 2758.058	GFSU14-1626	25.47	12.01	9.9	5.5	4.36	7	8.08	3.04	1.22	1.9	1.7	5.83	1.6	1.6	6	5.35	4.05	2.48	2.95	6.6	6.27	5.53	5.42	7.08	2.71	6.77	9.1	6.3	33	38	7	6	5	5	14	23	3	1	3	7	6	6	2
Guyanancistrus brevispinis brevispinis			GBSur	SU, Gran Rio, Suriname	MHNG 2673.034		28.81	13.18	11.07	6.52	4.82	8.13	9.43	3.41	1.1	2.14	1.42	6.37	2.08	1.94	6.94	6.8	4.61	2.93	2.65	7.31	7.74	7.44	6.35	7.85	3.08	8.26	10.02	7.66	32	34	7	6	5	5	14	23	2	1	3	7	6	6	1.5
Guyanancistrus brevispinis brevispinis			GBSur	SU, Gran Rio, Suriname	MHNG 2673.034		47.38	20.85	17.36	10.07	7.41	13.42	15.06	5.26	1.57	3.03	2.9	10.95	3	2.96	12.14	11.29	7.88	4.45	4.84	13.33	11.95	11.7	10.5	13.23	4.88	12.66	16.65	12.31	38	39	7	6	5	5	14	24	3	1	3	8	5	6	1.5
Guyanancistrus brevispinis brevispinis			GBSur	SU, Gran Rio, Suriname	MHNG 2673.034	SU05-212	53.27	22.64	18.62	11.32	8.6	15.37	17.87	6.08	1.92	3.34	3.17	12.62	3.48	3.46	13.71	13.5	9.08	5.14	5.6	15.75	14	13.51	13.03	15.57	5.79	14.78	19.35	14.49	45	44	7	6	5	5	14	23	3	1	3	8	5	7	1
Guyanancistrus brevispinis brevispinis			GBSur	SU, Gran Rio, Suriname	MHNG 2673.034	SU05-218	79.67	32.14	25.92	16.43	12.28	22.42	25.59	8.65	2.67	4.58	4.53	17.27	5.06	5	20.81	21.25	14.02	7.23	8.32	23.84	19.41	19	18.21	23.53	8.3	19.6704	27.68	22.13	58	52	7	6	5	5	14	23	3	1	3	8	6	6	1
Guyanancistrus brevispinis brevispinis			GBSur	SU, Gran Rio, Suriname	MHNG 2673.034	SU05-215	94.48	39.43	31.29	20.3	14.49	25.47	29.71	10.05	3.19	5.2	5.22	19.84	6.2	5.59	23.53	23.87	17.11	7.98	9.72	28.36	24.18	22.6	24	27.15	9.76	23.93	31.01	26.77	51	45	7	6	5	5	14	24	3	1	3	7	7	6	2
Guyanancistrus brevispinis brevispinis			GBSur	SU, Gran Rio, Suriname	MHNG 2673.034	SU05-226	102.64	42.76	33.43	21.6	15.62	28.14	33.58	11.44	3.13	5.52	5.59	23.8	6.78	6.45	25.69	26.77	18.25	8.96	11.27	31.83	25.17	24.32	24.34	29.95	10.81	25.25	32.3868	29.21	42	46	7	6	5	5	14	23	3	1	3	7	7	6	1.5
Guyanancistrus brevispinis brevispinis			GBSur	SU, Gran Rio, Suriname	MHNG 2673.034	SU05-210	107.67	45.44	36.32	23.39	17.09	30.44	36.43	12.16	3.57	5.81	5.5	24.33	7.61	7.87	26.07	27.37	19.3	9.12	11.89	33.27	25.53	27.1	28.2	29.82	11	23.27	34.17	33.62	33	32	7	6	5	5	14	24	3	1	3	8	6	6	1
Guyanancistrus brevispinis brevispinis			GBSur	SU, Gran Rio, Suriname	MHNG 2673.034		121.45	48.14	36.49	23.99	17.85	33.5	38.66	13.28	3.83	6.2	5.63	26.1	7.65	8.2	29.48	32.37	24.12	11.29	15.42	39.63	29.84	30.5	32.63	35.83	12.29	30.71	38.64	33.88	43	40	7	6	5	5	14	23	3	1	3	7	7	6	1.5
Guyanancistrus brevispinis brevispinis			GBSur	SU, Gran Rio, Suriname	MHNG 2673.034		30.89	13.78	11.03	6.44	4.59	8.6	9.95	3.58	1.32	2.35	1.99	7.23	1.94	1.8	7.26	7.11	5.07	2.98	2.87	7.88	7.8	7.71	7.51	8.41	3	7.5	11.19	7.12	32	30	7	6	5	5	14	22	3	1	3	8	6	6	1
Guyanancistrus brevispinis brevispinis			GBSur	SU, Gran Rio, Suriname	MHNG 2673.034		52.78	22.56	18.29	11.06	7.9	13.98	16.53	5.71	1.91	3.34	3.11	11.93	3.36	3.28	13.63	12.78	9.07	4.81	5.07	15.04	13.54	13.07	12.54	15.64	5.16	13.2348	17.78	13.13	36	38	7	6	5	5	14	24	3	1	3	7	6	6	2
Guyanancistrus brevispinis brevispinis			GBSur	SU, Gran Rio, Suriname	MHNG 2673.034	SU05-214	57.41	25.23	19.74	12.13	8.26	15.81	18.29	6.64	2.15	3.68	3.49	12.96	3.96	4.23	15.42	13.19	9.86	4.99	5.74	17.75	14.69	14.2	14.16	16.44	5.7	15.23	18.69	14.17	37	35	7	6	5	5	14	23	3	1	3	8	6	6	1.5
Guyanancistrus brevispinis brevispinis			GBSur	SU, Gran Rio, Suriname	MHNG 2673.034	SU05-225	88.58	38.24	28.96	18.71	12.68	23	27.67	10.13	3.45	4.74	4.8	19.2	6.31	6.5	20.96	20.96	15.86	7.53	9.08	27.43	21.88	21.22	20.36	26.05	8.79	20.17	28.3158	23.24	45	47	7	6	5	5	14	24	3	1	3	8	6	6	1
Guyanancistrus brevispinis brevispinis			GBSur	SU, Gran Rio, Suriname	MHNG 2673.034	SU05-211	94.74	40.43	29.63	18.9	13.4	24.77	29.72	10.51	3.4	4.97	4.8	21.14	5.83	5.67	22.23	23.22	15.75	7.45	9.41	27.59	21.39	22.49	23.65	28.89	9.49	21.68	30.0994	25.85	46	41	7	6	5	5	14	25	4	1	3	7	6	6	2
Guyanancistrus brevispinis brevispinis			GBSur	SU, Gran Rio, Suriname	MHNG 2673.034		104.82	46.51	33.62	22.52	15.94	27.83	33.43	12.4	4.16	5.46	6.25	24.32	7.06	7.67	24.45	25	18.78	8.19	10.57	31.13	25.76	24.76	26.57	30.9	10.36	24.25	31.59	30.96	40	37	7	6	5	5	14	24	3	1	3	8	6	6	2.5
Guyanancistrus brevispinis brevispinis			GBSur	SU, Gran Rio, Suriname	MHNG 2673.034		110.02	46.03	35.43	23.86	16.95	29.96	35.85	12.69	4.2	5.6	5.62	25.7	7.51	8.15	26.01	27.72	20.27	9.07	12.88	34.15	26.89	26.2	27.93	31.13	11.25	27.16	33.14	31.13	43	45	7	6	5	5	14	24	3	1	3	8	6	6	1
Guyanancistrus brevispinis brevispinis			GBSur	SU, Gran Rio, Suriname	MHNG 2673.034		124.76	54.63	39.34	26.96	18.17	32.93	41.04	13.8	5.56	6.03	7.07	28.82	8.63	9.18	31.77	30.11	22.39	10.43	15.96	40.21	33.24	30.48	30.85	35.22	13.06	33.78	38.2	35.13	53	47	7	6	5	5	14	23	4	1	3	8	6	6	0.5
Guyanancistrus brevispinis brevispinis			GBMarTap	SU, Palomeu, Tapanahony, Maroni	MHNG 2717.035	SU08-761	28.18	12.85	10.96	6.45	4.87	7.87	9.12	3.37	1.12	2.18	1.95	6.84	1.75	1.81	7.37	6.67	4.2	2.34	3.09	7.55	7.09	6.51	6.06	7.42	3.08	8.14	10.26	6.99	31	30	7	6	5	5	14	23	2	1	3	8	6	6	0.5
Guyanancistrus brevispinis brevispinis			GBMarTap	SU, Palomeu, Tapanahony, Maroni	MHNG 2717.035	SU08-760	30.6	14.08	11.68	6.79	5.1	8.23	10.07	3.53	1.31	2.3	2.2	6.67	1.97	2.32	7.49	7.07	5.12	2.74	3.39	8.88	7.73	6.67	6.85	8.68	3.4	8.9	10.9943	7.67	26	29	7	6	5	5	14	25	2	1	3	8	6	6	2
Guyanancistrus brevispinis brevispinis			GBMarTap	SU, Palomeu, Tapanahony, Maroni	MHNG 2717.035	SU08-759	34.8	15.42	13.35	8.01	6.2	9.81	11.46	4.08	1.35	2.71	2.28	8.36	2.15	2.45	9.12	9.18	5.33	3.23	4	10.37	9.29	7.63	7.99	8.95	3.86	9.5	12.25	9.39	35	35	7	6	5	5	14	24	2	1	3	8	5	17	1
Guyanancistrus brevispinis brevispinis			GBMarTap	SU, Palomeu, Tapanahony, Maroni	MHNG 2717.035	SU08-757	41.61	17.85	14.88	8.93	6.64	11.26	12.97	4.52	1.39	2.79	2.33	9.43	2.62	2.99	10.5199	10.13	6.85	3.54	4.22	11.32	10.39	9.41	9.31	11.98	4.24	11.4744	14.61	10.13	37	47	7	6	5	5	14	23	2	1	3	8	6	6	2
Guyanancistrus brevispinis brevispinis			GBMarTap	SU, Palomeu, Tapanahony, Maroni	MHNG 2717.035	SU08-755	45.7	20.49	17.02	10.48	7.95	12.83	15.18	5.41	1.51	3.27	2.88	11.06	2.96	3.34	11.9	11.37	7.54	4.08	4.93	13.48	12.26	10.69	10.89	12.53	5.17	12.42	16.08	12.48	37	38	7	6	5	5	14	24	2	1	3	8	6	6	1
Guyanancistrus brevispinis brevispinis			GBMarTap	SU, Palomeu, Tapanahony, Maroni	MHNG 2717.035	SU08-756	47.85	20.06	16.46	9.84	7.49	12.91	14.8	5.35	1.6	3.27	2.84	10.23	3	3.18	11.76	11.45	8.86	4.31	4.62	13.29	11.6	10.24	10.64	14.01	4.78	12.9127	15.88	12.2	35	35	7	6	5	5	14	24	2	1	3	8	6	6	2
Guyanancistrus brevispinis brevispinis			GBMarTap	SU, Palomeu, Tapanahony, Maroni	MHNG 2717.035	SU08-731	49.71	21.4	17.65	10.84	8.22	13.82	16.03	5.38	1.78	3.41	3.01	11.18	3.31	3.19	12.4774	12.74	8.48	4.41	5.43	14.44	12.89	12.33	11.72	13.21	5.26	13.3414	17.49	12.64	32	37	7	6	5	5	14	23	2	1	3	8	6	6	2
Guyanancistrus brevispinis brevispinis			GBMarTap	SU, Palomeu, Tapanahony, Maroni	MHNG 2717.035	SU08-732	51.57	22.03	18.17	11.17	8.85	14.24	16.36	5.6	1.77	3.56	2.8	11.73	3.21	3.64	12.49	12.66	9.13	4.8	5.43	13.87	12.75	11.65	12.23	15.18	5.75	13.96	17.7191	14.74	45	43	7	6	5	5	14	24	4	1	3	8	6	6	2
Guyanancistrus brevispinis brevispinis			GBMarTap	SU, Palomeu, Tapanahony, Maroni	MHNG 2717.035	SU08-730	69.54	28.59	23.27	14.7	11.4	19.57	22.77	7.67	2.35	4.49	3.69	16	4.58	4.87	17.84	18.35	12.36	6.04	7.3	21.16	18.16	17.09	16.74	18.6	7.39	19.21	23.4818	18.88	52	46	7	6	5	5	14	24	2	1	3	8	6	6	2
Guyanancistrus brevispinis brevispinis			GBMarTap	SU, Palomeu, Tapanahony, Maroni	MHNG 2726.060	SU08-729	96.56	42.95	32.74	21.23	14.68	25.93	30.79	10.54	3.86	5.51	4.9	22.23	7.11	7.16	23.57	24.69	16.22	7.98	10.47	31.41	24.69	22.4	25.65	27.7	10.07	23.33	32.1467	26.74	45	45	7	6	5	5	14	24	3	1	3	8	6	6	1.5
Guyanancistrus brevispinis brevispinis			GBMarUp	GF, Litany, Maroni	MHNG 2725.099	GF00-103	74.72	30.49	24.86	15.51	12.12	20.48	23.4	8.44	2.54	4.78	4.11	15.75	4.93	4.74	21.02	19.59	13.18	6.84	6.81	22.73	18.82	17.65	18.43	21.41	7.96	19.55	26.79	20.22	49	48	7	6	5	5	14	25	3	1	3	8	6	6	2
Guyanancistrus brevispinis brevispinis			GBMarUp	Inini, Maroni River	MHNG 2593.087		46.78	19.74	15.89	9.41	7.57	11.93	13.71	5.09	1.8	3.16	2.56	10.14	2.62	2.82	12.01	11.2	8.19	4.69	4.58	12.49	11.52	11.13	11.08	13.99	4.53	11.46	15.72	11.47	34	35	7	6	5	5	14	23	2	1	3	8	6	7	2
Guyanancistrus brevispinis brevispinis			GBMarUp	Inini, Maroni River	MHNG 2593.087		75.41	34.47	26.56	16.4	12.71	20.75	23.99	9.28	2.95	4.75	4.94	15.7	4.9	5.16	18.42	18.96	14.73	7.39	7.41	22.97	19.35	18.62	17.5	20.67	7.86	17.79	23.23	21.21	41	39	7	6	5	5	14	23	4	1	3	8	6	6	1.5
Guyanancistrus brevispinis brevispinis			GBMarUp	Inini, Maroni River	MHNG 2593.087		84.93	37.42	27.81	18.2	13.53	22.66	25.6	9.45	2.69	5.11	4.61	17.88	5.43	5.93	23.14	22.14	14.19	8.66	9.44	26.59	22.49	19.25	21	23.57	8.99	22.0718	25.23	22.48	48	45	7	6	5	5	14	24	3	1	3	8	6	6	1
Guyanancistrus brevispinis brevispinis			GBMarUp	Inini, Maroni River	MHNG 2593.087		94.81	40.5	31.3	19.49	14.42	25.62	29	10.65	3.22	5.65	4.86	20.62	6.57	7.13	24.63	23.31	16.41	8	9.24	30.2	24.52	20.2	24.22	27.38	9.54	25.86	30.72	24.92	47	45	7	6	5	5	14	24	3	1	3	8	6	6	1.5
Guyanancistrus brevispinis bifax			GBMarLow	GF, crique Voltaire, bas Maroni	MHNG 2683.029	GF06-462	62.99	26.89	21.77	13.58	10.63	17.95	19.71	6.85	2.27	4.12	3.04	13.54	3.82	4.13	17.54	15.38	11.53	5.67	6.87	18.62	16.47	14.73	15.52	18.33	6.46	15.68	7.0174	17.93	51	58	7	6	5	5	14	24	3	1	3	7	7	7	1.5
Guyanancistrus brevispinis bifax			GBMarLow	GF, crique Voltaire, bas Maroni	MHNG 2683.029	GF06-468	69.67	29.67	23.6	14.72	13.04	19.86	21.62	7.6	2.48	4.82	3.62	15.32	4.36	3.96	19.34	18.04	13	5.24	6.92	21.15	18.27	17.51	16.49	20.58	6.66	19.01	23.66	20.04	53	49	7	6	5	5	14	24	2	1	3	7	6	7	1
Guyanancistrus brevispinis bifax			GBMarLow	GF, crique Voltaire, bas Maroni	MHNG 2683.029	GF06-464	71.64	29.87	23.21	14.63	11.39	19.28	22.08	7.64	2.44	4.42	3.45	15.75	4.6	4.85	17.13	17.5	13.54	6.04	6.32	20.3	17.28	15.78	16.86	19.93	6.67	18.71	24.42	18.86	47	40	7	6	5	5	14	24	3	1	3	7	7	6	2.5
Guyanancistrus brevispinis bifax			GBMarLow	GF, crique Voltaire, bas Maroni	MHNG 2683.029	GF06-463	81.41	34.46	26.65	16.25	13.6	22.51	24.56	9.05	2.56	5.14	3.95	17.39	4.86	4.72	20.69	21.1	14.58	6.38	9.13	23.75	20.46	18.9	20.3	23.15	7.72	22.53	27.37	23.01	40	41	7	6	5	5	14	24	3	1	3	7	6	7	1.5
Guyanancistrus brevispinis bifax			GBMarLow	GF, crique Voltaire, bas Maroni	MHNG 2683.029	GF06-461	84.55	35.12	27.95	17.66	13.31	23.63	25.91	10.09	3.03	5.3	4.24	18.97	5.58	5.44	22.57	21.49	16.21	7.3	10.5	25.65	21.04	18.49	20.7	24.37	8.26	20.94	28.3381	23.11	44	43	7	6	5	5	14	24	3	1	3	7	7	6	2
Guyanancistrus brevispinis bifax			GBMarLow	GF, crique Voltaire, bas Maroni	MHNG 2683.029	GF06-467	88.08	36.65	28.45	17.99	14.61	24.47	27.46	9.28	2.86	5.51	4.07	19.05	4.83	5.52	22.5628	24	15.8	7.51	11.5	26.48	22.51	19.51	21.55	25.51	8.1	23.88	29.42	24.61	43	38	7	6	5	5	14	24	3	1	3	7	6	7	2
Guyanancistrus brevispinis bifax		BM	GBMarLowBM	GF, crique Voltaire, bas Maroni	MHNG 2683.043	GF06-481	29.31	13.7	11.41	6.69	5.04	7.55	8.87	3.38	1.31	2.3	1.85	6.51	2.11	2.05	6.48	6.78	4.79	2.84	2.84	6.91	7.13	7.21	6.66	7.55	2.72	7.41	10.24	7.04	32	34	7	6	5	5	14	23	3	1	3	8	6	6	2
Guyanancistrus brevispinis bifax		BM	GBMarLowBM	GF, crique Voltaire, bas Maroni	MHNG 2683.043	GF06-499	44.64	19.98	16.34	10.06	7.34	12.15	13.52	5.05	1.76	3	2.23	9.88	2.78	3.27	9.85699	11.18	7.84	3.84	4.07	12.03	11.07	9.62	10.28	13.48	4.31	10.4022	13.7185	11.66	37	35	7	6	5	5	14	24	2	1	3	7	6	7	2.5
Guyanancistrus brevispinis bifax		BM	GBMarLowBM	GF, crique Voltaire, bas Maroni	MHNG 2683.043	GF06-494	54.05	23.78	19.49	12.07	9.08	14.88	16.77	5.68	2.03	3.6	3.04	12.28	3.77	3.84	12.56	13.25	9.06	4.62	4.63	13.72	12.97	12.6	13.04	15.34	4.76	12.29	16.88	14.58	40	43	7	6	5	5	14	24	3	1	3	7	7	6	2.5
Guyanancistrus brevispinis bifax		BM	GBMarLowBM	GF, crique Voltaire, bas Maroni	MHNG 2683.043		73.32	31.36	24.55	15.83	11.89	20.1	22.92	7.35	2.85	5.28	3.49	16.24	5.58	5.59	17.2604	18.47	12.92	5.7	6.55	21.09	18.28	16.02	18.59	19.67	6.59	18.02	24.17	19.93	40	43	7	6	5	5	14	24	3	1	3	8	6	7	3
Guyanancistrus brevispinis bifax		BM	GBMarLowBM	GF, crique Voltaire, bas Maroni	MHNG 2683.043	GF06-501	38.69	17.62	14.58	8.55	6.26	10.42	11.77	4.53	1.36	2.49	2.29	8.23	2.31	2.52	7.68	9.1	6.19	3.41	4.38	9.54966	8.42	8.79	9.17	10.99	3.58	8.95	11.66	9.76	30	31	7	6	5	5	14	23	3	1	3	8	6	6	2
Guyanancistrus brevispinis bifax		BM	GBMarLowBM	GF, crique Voltaire, bas Maroni	MHNG 2683.043	GF06-500	47.94	21.79	17.19	10.45	7.72	12.6	14.28	5.58	1.92	3.17	2.63	10.44	3.03	2.97	10.7088	11.75	8.79	4.1	4.72	11.79	10.83	10.14	11.45	14.21	4.53	11.33	14.23	10.82	39	35	7	6	5	5	14	24	3	1	3	8	6	6	2.5
Guyanancistrus brevispinis bifax		BM	GBMarLowBM	GF, crique Voltaire, bas Maroni	MHNG 2683.043	GF06-488	62.7	28.08	22.15	13.8	10.31	16.39	18.98	6.89	2.86	4	3.12	13.63	4.68	4.93	13.56	14.72	10.87	4.79	5.51	16.21	14.69	13.3	14.63	17.04	5.37	14.8155	20.38	15.29	35	31	7	6	5	5	14	25	3	1	3	8	6	6	1.5
Guyanancistrus brevispinis bifax		BM	GBMarLowBM	GF, crique Voltaire, bas Maroni	MHNG 2683.043	GF06-489	65.24	29.25	23.1	14.17	10.58	17.07	19.54	7.36	2.86	4.1	3.71	14.65	4.78	5.02	15.1746	15.4	11.84	5.52	5.94	18.14	15.79	14.25	15.38	19.09	6.21	15.4362	20.5156	16.53	48	43	7	6	5	5	14	24	3	1	2	7	6	6	2.5
Guyanancistrus brevispinis bifax		BM	GBMarLowBM	GF, crique Voltaire, bas Maroni	MHNG 2683.043	GF06-483	70.8	32.05	24.94	15.56	11.37	19	20.99	7.48	2.88	4.48	4.23	15.38	5.28	5.33	17.27	16.5	12.78	5.13	7.13	19.67	16.02	15.61	17.06	21.02	6.14	16.52	21.32	16.75	41	38	7	6	5	5	14	24	3	1	3	8	6	6	1.5
Guyanancistrus brevispinis bifax		BM	GBMarLowBM	GF, crique Voltaire, bas Maroni	MHNG 2683.043	GF06-490	74.42	32.99	25.38	16.42	12.07	19.74	22.3	8.2	2.74	5.07	3.25	16.4	5.68	5.37	17.63	18.07	13.25	6.38	6.97	20.04	17.3	16.33	18.24	20.78	6.55	17.6795	23.58	18.53	27	24	7	6	5	5	14	24	3	1	3	7	7	6	3
Guyanancistrus brevispinis bifax			GbMana	GF, Petit Laussat, basse Mana	MHNG 2734.090	GFSU12-171	67	29.36	24.22	15.17	11.19	19.44	22.23	7.5	2.55	4.87	3.57	15.41	4.75	4.77	16.89	17.62	11.53	6.55	6.22	20.69	17.54	17.22	17.31	18.57	6.5	18.45	25.49	19.75	62	60	7	6	5	5	14	23	3	1	3	8	6	6	1.5
Guyanancistrus brevispinis bifax			GbMana	GF, Petit Laussat, basse Mana	MHNG 2734.090	GFSU12-172	72.54	31.31	25.47	16.17	13.29	20.5	23.03	8.28	2.46	4.88	3.68	16.22	5.36	5.55	18.93	18.73	12.14	6.3	6.71	21.3	18.48	16.15	17.79	20.34	7.21	19.61	24.88	20.54	57	53	7	6	5	5	14	24	3	1	3	8	6	6	1.5
Guyanancistrus brevispinis bifax			GbMana	GF, Petit Laussat, basse Mana	MHNG 2734.090	GFSU12-155	77.1	32.91	26.48	17.01	11.77	20.74	23.9	8.31	3.22	4.83	3.88	17.5	5.6	5.64	19.16	19.41	14.29	7.11	7.3	23.18	19.54	17.55	18.6	22.23	7.42	21.27	27.44	19.7	56	55	7	6	5	5	14	24	3	1	3	7	7	7	2
Guyanancistrus brevispinis bifax			GbMana	GF, Petit Laussat, basse Mana	MHNG 2734.090	GFSU12-156	87.26	36.29	29.76	19.41	14.1	24.02	27.34	10.22	3.27	5.2	4.46	19.4	6.31	6	22.85	23.3	16.11	8.2	9.38	27.69	23.92	19.67	22.25	25.27	8.41	24.28	31.43	23.95	61	56	7	6	5	5	14	24	3	1	3	8	7	6	1.5
Guyanancistrus brevispinis bifax			GbMana	GF, Petit Laussat, basse Mana	MHNG 2734.090	GFSU12-145	96.6	39.88	32	20.13	15.56	25.49	28.94	10.89	3.95	5.32	4.66	20.62	6.64	6.5	24.85	24.61	17.51	7.94	11.31	28.22	23.88	21.06	23.75	27.82	8.92	25	32.42	24.22	72	59	7	6	5	5	14	24	3	1	3	7	7	7	2
Guyanancistrus brevispinis bifax			GbMana	GF, Petit Laussat, basse Mana	MHNG 2734.090	GFSU12-147	97.33	40.6	32.03	20.44	16.93	26.81	30.42	11.42	3.74	5.87	4.8	21.4	6.95	7.12	25.38	26.6	18.48	8.67	13.14	29.56	25.62	22.8	24.37	27.35	9.64	27.27	32.68	26.16	57	57	7	6	5	5	14	24	3	1	3	7	7	6	1.5
Guyanancistrus brevispinis bifax			GbMana	GF, Petit Laussat, basse Mana	MHNG 2734.090	GFSU12-150	69.39	29.22	24.15	15.71	12.05	18.66	21.12	7.88	2.56	4.63	4.01	14.9	4.8	5.01	17.53	17.65	12.64	5.68	6.5	19.49	16.98	15.75	16.33	19.8	6.43	18.25	23.26	17.95	42	41	7	6	5	5	14	24	4	1	3	7	7	6	2
Guyanancistrus brevispinis bifax			GbMana	GF, Petit Laussat, basse Mana	MHNG 2734.090	GFSU12-151	72.66	32.3	26.17	16.39	11.77	19.28	22.43	8.31	2.7	4.7	4.43	16.14	5.17	5.44	18.92	18.17	14.07	6.85	7.17	22.64	18.56	16.76	17.59	19.71	6.83	19.26	25.89	19.87	57	47	7	6	5	5	14	24	3	1	2	8	6	6	2
Guyanancistrus brevispinis bifax			GbMana	GF, Petit Laussat, basse Mana	MHNG 2734.090	GFSU12-153	82.45	34.91	28.07	17.36	12.75	22.17	25.53	8.7	3.46	4.78	4.07	18.34	5.76	5.76	21.59	21.24	14.35	6.98	8.28	24.47	21.15	20.14	19.52	21.31	7.84	21.8	26.61	20.07	54	50	7	6	5	5	14	23	4	1	3	8	6	6	1.5
Guyanancistrus brevispinis bifax			GbMana	GF, Petit Laussat, basse Mana	MHNG 2734.090	GFSU12-152	92.96	39.69	31.7	20.5	14.79	24.52	28.94	11.13	4.01	5.86	4.72	21.03	6.74	6	24.19	23.6	16.85	7.96	9.36	27.91	24.97	23.08	23.92	25.1	8.45	24.98	32.96	24.06	60	57	7	6	5	5	14	24	3	1	3	8	6	5	1.5
Guyanancistrus brevispinis bifax			GbMana	GF, Petit Laussat, basse Mana	MHNG 2734.090	GFSU12-140	102.68	42.51	33.8	21.5	16.27	27.11	30.93	11.66	4.17	5.89	5.21	21.67	6.84	6.71	25.48	25.22	20.19	8.77	13.47	30.67	25.85	23.6	25.39	29.54	9.57	29.12	34.82	25.28	52	53	7	6	5	5	14	24	3	1	3	8	6	6	2
Guyanancistrus brevispinis bifax			GbMana	GF, Petit Laussat, basse Mana	MHNG 2734.090	GFSU12-143	106.53	43.96	35.53	22.81	16.34	28.34	33.14	11.92	4.98	6.09	5.82	22.86	7.65	7.49	27.73	27.42	21.35	8.52	12.47	34.56	28.36	24.6	25.32	30.76	10.37	27.88	34.46	25.75	56	60	7	6	5	5	14	23	3	1	3	8	6	6	2
Guyanancistrus brevispinis bifax			GbMana	GF, crique Portal, haute Mana	MHNG 2683.050	GF06-531	67.19	27.51	22.35	13.99	11.34	18.47	20.32	7.54	2.08	4.44	3.14	14.04	4.15	4.36	18.57	17.92	12.78	6.7	7	20.32	14.74	15.62	15.45	19.53	6.45	17.77	23.25	17.71	57	58	7	6	5	5	14	24	3	1	3	7	6	7	2
Guyanancistrus brevispinis bifax			GbMana	GF, crique Portal, haute Mana	MHNG 2683.050	GF06-530	72.61	30.33	24.25	15.06	11.59	20.02	22.04	8.01	2.16	4.88	3.78	16.2	4.38	4.51	18.35	18.99	13.04	6.88	7.82	20.89	17.84	17.76	17.84	20.77	6.76	18.87	24.22	19.76	52	59	7	6	5	5	14	24	3	1	3	7	7	6	2.5
Guyanancistrus brevispinis bifax			GbMana	GF, crique Portal, haute Mana	MHNG 2683.050	GF06-534	69.77	30.43	24.6	14.7	12.73	19.31	21.3	7.58	2.51	5.12	3.52	15.69	4.6	5	17.97	18.69	12.69	6.68	6.51	20.09	16.99	15.77	16.9	20.13	6.38	18.76	24.67	19.71	56	51	7	6	5	5	14	24	3	1	3	7	6	7	2.5
Guyanancistrus brevispinis bifax			GbMana	GF, crique Portal, haute Mana	MHNG 2683.050	GF06-533	71.37	30.5	24.45	14.78	12.13	18.7	21.44	7.91	2.41	4.82	3.48	15.27	4.52	4.47	17.69	18.25	14.03	7.2	7.06	19.92	16.44	15.03	16.71	21.53	6.22	17.52	21.33	18.31	53	55	7	6	5	5	14	24	3	1	3	7	7	6	2.5
Guyanancistrus brevispinis bifax			GbMana	GF, crique Portal, haute Mana	MHNG 2683.050	GF06-532	65.84	28.08	22.41	13.63	11.24	18.48	20.32	7.25	2.2	4.44	3.42	14.34	4.26	4.27	18.27	16.35	12.65	6.81	6.71	19.17	16.12	15.93	14.92	19.71	6.26	17.7298	23.85	17.67	55	52	7	6	5	5	14	24	3	1	3	7	7	6	2.5
Guyanancistrus brevispinis bifax		BM	GbManaBM	GF, crique Aya, haute Mana	MHNG 2699.080	GF07-013	35.33	16.36	13.69	8.03	5.83	9.71	11.19	4.21	1.49	2.46	2.48	7.88	2.43	2.7	7.9452	8.43	6.34	3.29	2.85	7.92	8.07	7.46	8.33	9.94	3.51	8.43	11.38	9.09	29	35	7	6	5	5	14	24	2	1	3	7	7	6	3
Guyanancistrus brevispinis bifax		BM	GbManaBM	GF, crique Aya, haute Mana	MHNG 2699.080	GF07-009	46.39	21.03	17.68	10.85	7.37	13.07	14.78	5.17	2.13	3.15	2.42	10.38	3.47	3.6	9.81	11.01	7.56	3.72	4.25	11.09	11.04	9.88	11.71	12.86	4.5	10.4	15.61	12.96	42	40	7	6	5	5	14	24	3	1	3	7	7	6	2.5
Guyanancistrus brevispinis bifax		BM	GbManaBM	GF, crique Aya, haute Mana	MHNG 2699.080	GF07-107	54.92	24.27	19.76	11.89	9.2	15.62	17.68	6.34	1.99	4.08	3.31	12.55	3.79	3.95	14.53	14.61	9.49	4.64594	5.6	15.25	13.85	12.4	13.5	15.7	5.21	15.25	21.9	15	50	48	7	6	5	5	14	24	4	1	3	7	7	6	1
Guyanancistrus brevispinis bifax		BM	GbManaBM	GF, crique Aya, haute Mana	MHNG 2699.080	GF07-007	74.67	34.25	25.79	15.75	12.54	19.96	23.39	8.03	3.17	4.82	3.98	16.44	5.42	5.68	17.78	19.08	13.38	6.27	6.94	20.49	17.75	16.5	18.22	20.33	6.95	17.89	25.79	19.92	57	53	7	6	5	5	14	24	3	1	3	7	7	6	2.5
Guyanancistrus brevispinis bifax		BM	GbManaBM	GF, crique Aya, haute Mana	MHNG 2699.080	GF07-014	32.59	15.09	12.55	7.48	5.32	8.27	9.87	3.74	1.45	2.38	2.05	7.56739	2.23	2.3	6.29	7.39	5.39	2.72	2.68	7.36	7.24	7.14	8.02	9.4	3.12	7.43115	10.79	8.11	27	29	7	6	5	5	14	23	3	1	3	7	7	6	2.5
Guyanancistrus brevispinis bifax		BM	GbManaBM	GF, crique Aya, haute Mana	MHNG 2699.080	GF07-010	44.95	20.53	16.56	10.15	6.66	11.67	13.14	5.21	2.19	3.03	2.53	9.76	3.32	3.52	8.78171	10.33	7.79	3.64	3.82	10.38	10.44	9.7	10.59	12.51	4.26	10.53	13.87	10.85	33	33	7	6	5	5	14	23	3	1	2	8	6	6	3
Guyanancistrus brevispinis bifax		BM	GbManaBM	GF, crique Aya, haute Mana	MHNG 2699.080	GF07-109	55.73	25.98	20.65	13.01	8.97	15.52	17.43	6.07	2.47	3.85	3.29	12.86	4.22	4.26	12.62	13.26	9.04	4.48	4.73	15.65	12.78	12.39	14.04	15.67	5.45	13.3173	15.71	14.39	40	40	7	6	5	5	14	23	3	1	3	8	6	5	2
Guyanancistrus brevispinis bifax		BM	GbManaBM	GF, crique Aya, haute Mana	MHNG 2699.080	GF07-108	59.2	26.88	21.61	13.36	9.24	15.59	17.96	6.69	2.79	3.7	3.47	12.91	4.45	4.69	13.76	13.73	10.12	3.66	5.08	15.92	13.97	13.05	14.16	16.38	5.77	13.18	18.07	15.47	47	45	7	6	5	5	14	23	3	1	3	8	7	5	2.5
Guyanancistrus brevispinis bifax		BM	GbManaBM	GF, crique Aya, haute Mana	MHNG 2699.080	GF07-106	65.01	29.65	23.09	14.5	10.49	18.19	20.43	7.62	3.09	4.34	4.16	13.74	4.67	4.57	14.5307	15.53	12.31	5.6	6.62	18.96	16.65	14.76	16.26	18.01	6.21	17.12	23.16	17.36	54	53	7	6	5	5	14	24	3	1	3	8	6	6	2.5
Guyanancistrus brevispinis bifax		BM	GbManaBM	GF, crique Aya, haute Mana	MHNG 2699.080	GF07-004	83.13	36.62	27.68	17.87	13	22.08	25.41	9.1	3.61	5.24	4.49	17.73	5.83	5.82	18.91	20.04	14.89	6.81	9.21	22.89	19.41	18.55	19.24	23.84	7.83	19.91	25.32	20.79	47	47	7	6	5	5	14	23	3	1	2	7	7	6	2.5
Guyanancistrus brevispinis bifax			Gbsin	GF, Crique Grégoire, bas Sinnamary	MHNG 2722.068	GF03-023	36.52	16.08	13.6	8.33	5.86	9.92	11.25	4.07	1.39	2.65	1.83	8.21	2.35	2.33	9.15	9.34	5.8	3.51	3.37	9.1	8.73	8.8	8.27	9.44	3.4	9.48	13.11	9.19	37	35	7	6	5	5	14	24	3	1	3	8	6	6	1
Guyanancistrus brevispinis bifax			Gbsin	GF, Crique Grégoire, bas Sinnamary	MHNG 2722.068	GF03-022	37.57	16.04	13.59	7.53	6.21	10.02	11.39	4.12	1.53	2.79	1.81	7.93	2.36	2.22	8.93	9.29	6.12	3.34	3.36	10	8.85	9.1	8.71	10.53	3.44	10.3552	12.49	10.01	34	35	7	6	5	5	14	25	3	1	3	8	6	7	2
Guyanancistrus brevispinis bifax			Gbsin	GF, Crique Grégoire, bas Sinnamary	MHNG 2722.068	GF03-031	59.75	25.3	20.73	12.75	9.68	15.6	18.11	6.63	2.07	3.99	2.75	12.9	3.77	3.79	14.43	14.37	10.82	5.21	6.45	16.2	14.58	13.62	14.39	17.16	5.49	14.44	19.2	15.27	50	45	7	6	5	5	14	23	3	1	3	7	7	6	1.5
Guyanancistrus brevispinis bifax			Gbsin	GF, Crique Grégoire, bas Sinnamary	MHNG 2585.018		57.7	23.3	18.9	10.9	8.5	15.62	17.3	6	1.68	4.3	2.79	12.3	3.5	3.35	15.3	14	10	5.53	6.11	17.4	14.4	14.38	12.63	17.9	5.9	16.3	20.8	14.66	50	48	7	6	5	5	14	24	3	1	3	7	5	7	1
Guyanancistrus brevispinis bifax			Gbsin	GF, Crique Coeur Maroni, bas Sinnamary	MHNG 2723.015		30.84	13.73	11.61	6.85	5.02	8.32	9.38	3.48	1.31	2.1	1.76	6.61	1.89	2.15	7.34189	7.18	4.85	3.05	3.35	7.68	7.53	6.36	6.51	8.74	3.01	9.02335	11.68	7.53	25	33	7	6	5	5	14	24	2	1	3	7	6	7	1.5
Guyanancistrus brevispinis bifax			Gbsin	GF, Crique Coeur Maroni, bas Sinnamary	MHNG 2723.015		36.58	15.7	13.03	7.73	5.74	9.99	11.04	4	1.56	2.6	2.07	7.93	2.28	2.27	9.32	9.33	6.35	3.39	3.46	9.1	8.65	9.07	8.24	10.71	3.31	9.09	13.1185	9.31	35	37	7	6	5	5	14	24	2	1	3	7	7	6	2.5
Guyanancistrus brevispinis bifax			Gbsin	GF, Crique Coeur Maroni, bas Sinnamary	MHNG 2723.015		45.56	20.12	16.46	9.99	7.37	12.54	14.21	5.07	1.95	3.18	2.78	10.07	2.81	3.18	11.52	11.77	7.05	4.16191	4.07	12.46	10.87	10.42	10.16	13.25	4.45	11.79	15.6922	11.79	49	52	7	6	5	5	14	24	3	1	3	8	5	7	1
Guyanancistrus brevispinis bifax			Gbsin	GF, Crique Coeur Maroni, bas Sinnamary	MHNG 2723.015		61.03	24.75	20.71	12.7	9.81	16.78	18.35	6.54	2.03	3.95	3.07	12.54	3.89	3.78	17.04	15.64	11.13	5.28	6.2	18.68	14.93	13.91	14.63	17.77	5.61	15.57	19.85	16.21	50	51	7	6	5	5	14	24	2	1	3	7	6	7	1.5
Guyanancistrus brevispinis bifax			Gbsin	GF, Crique Coeur Maroni, bas Sinnamary	MHNG 2723.015		69.87	29.12	23.5	14.83	11.38	19.15	21.04	7.81	2.56	4.31	3.63	14.93	4.37	4.61	18.75	18.91	12.24	6.08	6.63	20.24	17.63	15.36	17.07	21.21	7.07	18.47	23.11	18.32	55	55	7	6	5	5	14	24	3	1	3	7	6	7	1.5
Guyanancistrus brevispinis bifax			Gbsin	GF, Crique Coeur Maroni, bas Sinnamary	MHNG 2723.015		87.06	36.9	30.09	19.04	14.3	23.26	27.17	9.32	2.94	5.26	5.09	19.4	5.96	5.8	23.6191	22.6	16.04	7.27	7.77	24.38	21.46	19.16	20.82	25.14	8.21	22.9	27.04	23.15	38	36	7	6	5	5	14	24	3	1	3	7	7	6	2
Guyanancistrus brevispinis bifax			Gbsin	GF, 2 Roros, haut Sinnamary	IRD		79.4	33.3	26.8	16.75	12.5	21.83	24.2	8.9	2.69	5.25	3.95	16.52	5.25	5.14	20	20.42	14.64	7.33	9.76	23.82	18.57	17.54	19.27	23.7	7.7	18.7322	28.0475	21.68	42	44	7	6	5	5	14	25	3	1	3	8	6	7	2
Guyanancistrus brevispinis bifax			Gbsin	GF, Saut Vata, haut Sinnamary	MHNG 2723.007		42.13	18.09	14.91	8.95	7.04	11.76	13.22	4.72	1.8	2.94	2.61	9.34	2.66	2.73	10.8583	11.21	7.62	4.1	4.49	11.81	10.59	9.47	9.47	12.5	4.34	11.2876	13.39	11.25	42	40	7	6	5	5	14	24	3	1	3	7	7	6	2
Guyanancistrus brevispinis bifax			Gbsin	GF, Saut Vata, haut Sinnamary	MHNG 2723.007		63.26	27.3	22.24	13.76	10.66	17.86	20.27	7.18	2.1	4.14	3.77	14.18	4.02	4.13	16.04	17.33	10.9	5.81	6.87	19.2	16.15	15.7	15.65	18.29	6.35	15.84	21.7	17.58	49	47	7	6	5	5	14	24	3	1	3	7	7	6	1.5
Guyanancistrus brevispinis bifax			Gbsin	GF, Saut Vata, haut Sinnamary	MHNG 2723.007		137.7	55.58	43.1	29.48	22.17	38.18	42.1	14.4	4.37	6.61	5.6	28.73	8.4	8.16	34.38	37.35	26.18	12.22	17.04	45.92	34.39	30.22	34.24	41.13	14.3	30.3775	50.9757	36.4	52	53	7	6	5	5	14	24	3	1	3	8	6	6	2
Guyanancistrus brevispinis bifax			Gbsin	GF, crique Maipouri, haut Sinnamary	MHNG 2723.009		51.07	21.95	18.13	11.43	8.29	13.77	15.36	5.21	2.11	3.62	2.84	11.07	3.42	3.86	12.12	12.33	9.4	4.29	4.5	14.43	12.2	11.02	11.69	15.18	4.57	13.0733	17.5261	13.36	45	51	7	6	5	5	14	24	3	1	3	7	6	7	3
Guyanancistrus brevispinis bifax			Gbsin	GF, crique Maipouri, haut Sinnamary	MHNG 2723.009		59.41	25.66	20.85	13.27	9.69	16.13	18.4	6.8	2.31	3.96	3.26	12.83	3.52	3.79	15.45	15.45	10.47	6.04	5.82	17.58	14.31	13.39	13.86	17.52	5.5	14.7392	22.23	15.54	50	53	7	6	5	5	14	24	3	1	3	8	6	7	1.5
Guyanancistrus brevispinis bifax			Gbsin	GF, crique Maipouri, haut Sinnamary	MHNG 2723.009		60.1	25.88	21.35	13.75	9.31	16.63	19.08	6.59	2.21	3.91	3.27	12.62	4.24	4.26	14.53	15.13	11.15	5.17	4.89	17.22	14.28	13.63	14.01	17.79	5.22	14.877	20.7888	16.3	47	52	7	6	5	5	14	24	3	1	3	7	7	6	3
Guyanancistrus brevispinis bifax			Gbsin	GF, crique Maipouri, haut Sinnamary	MHNG 2723.009		63.29	25.91	22.04	13.48	10.04	17.46	19.41	6.77	2.09	4.4	3.39	14.2	4.14	4.38	16.1078	15.75	11.67	5.38	5.29	18.18	15.41	14.39	14.69	19.25	5.57	15.67	21.9414	16.91	38	40	7	6	5	5	14	24	3	1	3	7	6	7	2.5
Guyanancistrus brevispinis bifax			Gbsin	GF, crique Maipouri, haut Sinnamary	MHNG 2723.009		66.75	28.48	23.11	14.56	10.46	17.91	20.88	7.24	2.21	4.14	3.59	15.12	4.55	4.96	17.224	16.21	11.78	5.93	6.18	18.46	16.35	14.05	15.75	19.52	6.02	16.2054	23.63	17.92	63	70	7	6	5	5	14	24	3	1	3	7	6	7	1.5
Guyanancistrus brevispinis bifax			Gbsin	GF, crique Maipouri, haut Sinnamary	MHNG 2723.009		67.13	27.94	22.98	14.18	10.73	18.2	20.46	7.14	2.5	4.38	3.8	14.62	4.43	4.52	17.3466	16.74	11.33	6.15	5.49	20.29	16.55	15.44	16.14	20.22	5.91	16.2813	23.3289	18.24	41		7	6	5	5	14	24	3	1	3	7	6	7	1.5
Guyanancistrus brevispinis bifax			Gbsin	GF, crique Maipouri, haut Sinnamary	MHNG 2723.009		86.76	35.58	28.89	19.19	13.82	23.66	26.32	9.25	3.31	5.14	4.3	18.84	6.37	6.88	23.6795	21.78	15.97	7.74	8.19	25.96	21.83	18.12	20.42	26.38	7.59	20.2023	30.4216	22.45	31	29	7	6	5	4	14	24	3	1	3	7	7	6	2
Guyanancistrus brevispinis bifax		BM	GbsinBM	GF, crique Maipouri, haut Sinnamary	MHNG 2723.008		40.31	17.87	15.11	9.13	6.74	10.6	12.3	4.5	1.78	2.91	2.39	9.17	2.71	2.86	8.7155	9.5	6.94	3.64	3.19	11.18	9.68	9.07	9.2	11.9	3.58	10.9191	13.8878	10.47	45	54	7	6	5	5	14	24	3	1	3	7	7	6	2
Guyanancistrus brevispinis bifax		BM	GbsinBM	GF, crique Maipouri, haut Sinnamary	MHNG 2723.008		41.51	17.98	14.62	8.89	6.73	11.13	12.56	4.28	1.54	2.92	2.43	9.26	2.71	2.89	9.03063	10.48	7.6	4.11	3.83	11.49	10.1	9.65	9.7	12.37	3.88	11.1587	14.3412	10.82	39	41	7	6	5	5	14	23	2	1	3	7	6	7	2.5
Guyanancistrus brevispinis bifax		BM	GbsinBM	GF, crique Maipouri, haut Sinnamary	MHNG 2723.008		47.28	21.52	17.95	11.39	7.81	12.36	14.81	5.23	2.01	3.45	2.56	11.17	3.61	3.88	10.49	10.88	7.89	3.95	3.77	12.17	11.17	11.11	11.1	13.22	4.28	12.3103	16.43	12.86	43	42	7	6	5	5	14	24	3	1	3	7	6	7	2
Guyanancistrus brevispinis bifax		BM	GbsinBM	GF, crique Maipouri, haut Sinnamary	MHNG 2723.008		55.16	23.48	19.58	12.56	8.39	15.2	17.09	6.01	2.21	3.63	3.02	11.68	3.79	3.92	12.6152	13.92	9.73	4.77	4.86	15.38	12.29	12.77	12.75	16.19	5.07	13.8832	19.4981	14.88	59	61	7	6	5	5	14	24	3	1	3	7	7	6	2.5
Guyanancistrus brevispinis bifax		BM	GbsinBM	GF, crique Maipouri, haut Sinnamary	MHNG 2723.008		59.67	26.74	21.83	14.08	9.43	15.23	18.13	6.04	2.48	3.93	3.32	13.25	4.46	4.86	14.05	13.85	10.25	4.7	5.45	16.31	15.19	12.81	14.2	16.44	5.5	14.7	21.61	15.18	48	52	7	6	5	5	14	24	3	1	3	7	6	7	2
Guyanancistrus brevispinis bifax		BM	GbsinBM	GF, crique Maipouri, haut Sinnamary	MHNG 2723.008		63.23	27.65	22.94	14.77	10.15	16.63	19.94	6.73	2.43	4.32	3.48	15.04	4.32	4.77	14.54	14.98	11.08	5.03	5.59	16.91	15.4	13.5	14.94	18.81	5.65	15.4939	22.23	16.39	28	31	7	6	5	5	14	24	3	1	3	7	6	7	2.5
Guyanancistrus brevispinis bifax		BM	GbsinBM	GF, crique Maipouri, haut Sinnamary	MHNG 2723.008		71.46	30.98	25.1	16.4	11.04	18.25	21.55	7.92	2.79	4.27	3.85	16	5.79	6.15	16.8958	17.79	11.59		5.97	19.55	17.22	15.71	17.74	19.76	6.41	17.1366	25.6562	18.41	25	24	7	6	5	5	14	24	3	0	3	7	6	7	2.5
Guyanancistrus brevispinis orientalis			GbOrap	GR, crique Nuage, Orapu	MHNG 2682.074	GF06-416	30.23	13.57	11.5	6.67	5.1	8.37	9.48	3.39	1.05	2.21	1.75	6.92	2.08	2.32	7.19	6.87	5.09	2.75	2.83	7.59	7.6	6.88	6.56	8.89	3.11	9.78	8.04	7.27	40	42	7	6	5	5	14	23	3	1	2	8	6	6	2.5
Guyanancistrus brevispinis orientalis			GbOrap	GR, crique Nuage, Orapu	MHNG 2682.074	GF06-417	32.37	14.63	11.73	7.34	5.46	8.8	10.19	3.59	1.25	2.28	1.89	7.40562	2.23	2.42	7.23	7.28	5.69	2.79	3.01	8.21	8.04	7.53	7.02	9.66	3.31	7.72	10.65	8.3	40	43	8	6	5	5	14	24	3	1	3	8	6	6	3
Guyanancistrus brevispinis orientalis			GbOrap	GR, crique Nuage, Orapu	MHNG 2682.074	GF06-411	40.6	17.57	14.31	8.68	6.79	11.06	12.48	4.2	1.48	2.88	2.28	8.71	2.6	2.96	9.83	9.51	6.61	3.85	3.67	10.52	10.2	8.74	8.64	11.85	4.16	9.99	14.16	10.06	47	45	7	6	5	5	14	24	3	1	3	7	6	7	2
Guyanancistrus brevispinis orientalis			GbOrap	GR, crique Nuage, Orapu	MHNG 2682.074	GF06-412	46.44	20.04	16.4	10.2	7.72	12.97	14.36	4.96	1.51	3.18	2.51	10.36	3.3	3.37	11.1	11.37	8.05	4.44	3.67	12.99	11.49	10.91	10.62	14.09	4.65	11.76	16.49	11.9	42	40	7	6	5	5	14	24	3	1	3	7	6	7	2.5
Guyanancistrus brevispinis orientalis			GbOrap	GF, crique Grillon, Comté	MHNG 2682.047	GF06-312	35.31	15.92	13.15	8.13	5.7	9.73	11	3.87	1.37	2.37	1.72	8.22	2.56	2.67	8.21028	8.46	6.17	3.22	3.48	8.5	8.72	8.09	8.25	10.46	3.6	8.99292	11.97	9.17	45	47	7	6	5	5	14	24	3	1	3	7	7	6	2.28571
Guyanancistrus brevispinis orientalis			GbOrap	GF, crique Grillon, Comté	MHNG 2682.047	GF06-306	46.5	19.99	16.51	10.52	7.26	12.74	14.2	5.07	1.57	3.05	2.71	10.28	3.52	3.5	10.98	11.55	7.77	3.75	4.53	11.87	10.99	10.21	10.56	13.88	4.53	11.4987	14.9036	11.87	47	49	7	6	5	5	14	23	3	1	3	8	6	6	2
Guyanancistrus brevispinis orientalis			GbOrap	GF, crique Grillon, Comté	MHNG 2682.047	GF06-309	58.05	24.95	20.19	12.73	9.57	16.38	18.21	6.55	1.92	3.75	3.28	13.14	4.4	3.99	13.8066	13.99	10.98	5.83	6.12	16.02	14.42	12.45	13.66	17.59	5.7	14.3	18.4551	14.98	67	65	7	6	5	5	14	24	4	0	3	7	7	6	2.5
Guyanancistrus brevispinis orientalis			GbOrap	GF, crique Grillon, Comté	MHNG 2682.047	GF06-303	66.87	28.64	22.56	14.78	10.86	18.35	20.6	7	2.18	3.91	3.93	14.69	4.69	4.94	15.9772	16.73	12.68	6.3	6.83	17.59	15.92	13.71	15.8	19.97	6.75	16.0601	21.1672	17.02	61	53	7	6	5	5	14	24	3	0	3	7	7	6	3
Guyanancistrus brevispinis orientalis			GbOrap	GF, crique Grillon, Comté	MHNG 2682.047	GF06-299	77.28	31.79	25.37	16.6	12.28	21.04	23.16	8.54	2.39	4.63	3.94	17.05	5.35	5.25	18.25	19.22	14.54	7.23	7.07	21.38	18.34	16.51	18.65	23.09	7.56	18.51	23.69	19.26	56	62	7	6	5	5	14	24	3	1	3	7	7	6	2.5
Guyanancistrus brevispinis orientalis			GbOrap	GF, crique Grillon, Comté	MHNG 2682.047	GF06-302	93	39.81	30.19	20.21	14.71	24.87	27.89	10.15	2.99	5.3	5.07	19.66	5.97	6.18	21.6	24.38	17.25	8.28	8.89	24.95	22.19	20.55	22.01	26.95	8.82	21.61	26.99	24.63	52	49	7	6	5	5	14	25	4	1	3	7	6	7	2.5
Guyanancistrus brevispinis orientalis			GbOrap	GF, crique Grillon, Comté	MHNG 2722.066		104.47	41.98	32.31	21.57	15.69	27.4	31.44	11.77	3.74	5.13	5.18	22.22	7.07	6.85	24.77	25.16	19.97	9.73	11.9	30.04	26.09	23.47	24.53	32.51	10.1	26.42	32.16	26.31	40	35	7	6	5	5	14	24	3	1	3	7	6	7	2
Guyanancistrus brevispinis orientalis			GbOrap	GF, crique Grillon, Comté	MHNG 2722.066		114.83	46.48	36.89	24.26	17.59	29.71	35.55	12.86	3.3	6.17	5.36	24.92	7.78	7.48	28.88	27.71	19.11	10.75	14.29	35.05	28.53	26.5	28.63	34.18	11.33	25.17	37.96	31.03	47	47	7	6	5	5	14	24	3	1	3	7	6	7	1.5
Guyanancistrus brevispinis orientalis			GBKaw	GF, crique Diamant, Kaw	MHNG 2723.011	GF99-046	47.74	21.09	17.58	10.65	8.04	14.12	15.48	5.39	1.46	3.34	2.9	11.35	3.79	4.04	11.0601	11.45	7.99	4.46	4.66	13.51	12.6	11.13	11.41	13.73	4.8	12.11	15.14	13.57	54	47	7	6	5	5	14	24	3	1	3	7	6	7	2.5
Guyanancistrus brevispinis orientalis			GBKaw	GF, crique Diamant, Kaw	MHNG 2723.011		51.17	22.93	18.66	11.47	8.68	14.25	15.95	5.62	1.5	3.42	2.57	11.83	3.73	4.08	12.2	11.97	9.2	4.83	5.2	14.23	13.2	11.86	11.86	15.03	4.84	12.7293	16.53	14.15	51	53	7	6	5	5	14	23	3	1	3	7	6	6	2.5
Guyanancistrus brevispinis orientalis			GBKaw	GF, crique Diamant, Kaw	MHNG 2723.011	GF99-044	53.59	23.11	18.81	11.86	8.75	14.91	16.42	6.26	1.97	3.49	3.12	12.21	3.99	4.34	11.93	12.38	9.86	4.71	5.33	14.64	13.35	12.42	12.6	15.5	5.38	12.88	15.42	14.79	47	45	7	6	5	5	14	24	2	1	3	7	7	6	2.5
Guyanancistrus brevispinis orientalis			GBKaw	GF, crique Diamant, Kaw	MHNG 2723.011	GF99-045	55.19	23.78	19.58	12.22	8.76	15.63	17.37	6.03	1.47	3.67	3.1	12.65	3.77	3.87	13.63	13.23	9.35	5.06	5.9	15.39	14.75	12.54	13.11	15.55	5.4	13.6878	19.3	14.97	47	42	7	6	5	5	14	23	3	1	3	7	6	7	2
Guyanancistrus brevispinis orientalis			GBKaw	GF, crique Diamant, Kaw	MHNG 2723.011	GF99-040	56.71	24.83	20.13	12.6	8.97	15.85	17.91	6.18	1.73	3.8	3.04	12.93	4.03	4.26	14.64	13.26	10.03	5.54	7.11	16.53	15.42	13.18	13.54	16.11	5.73	14.0502	18.8287	15.53	57	52	7	6	5	5	14	24	3	1	3	7	6	7	2
Guyanancistrus brevispinis orientalis			GBKaw	GF, crique Diamant, Kaw	MHNG 2723.011	GF99-041	58.69	25.78	20.8	13.12	9.54	16.16	17.94	6.17	1.78	4.17	3.12	13.47	4.49	5.09	13.62	13.51	11.13	4.58	5.5	15.82	15.31	14.01	14.33	16.96	5.5	14.75	19.93	15.85	54	52	7	6	5	5	14	25	4	1	3	7	7	6	3
Guyanancistrus brevispinis orientalis			GbApp	GF, Saut Mapaou, bas Approuague	MHNG 2621.099	SU01-156	39.23	16.71	13.48	8.27	6.8	10.75	12.17	4.38	1.62	2.86	2.38	8.58	2.44	2.51	9.6	9.63	7.4	3.81	4.19	9.53153	9.61	9.5	9.2	11.5	3.92	9.35563	13.3799	10.28	41	38	7	6	5	5	14	24	2	1	3	7	6	7	1.5
Guyanancistrus brevispinis orientalis			GbApp	GF, Saut Mapaou, bas Approuague	MHNG 2621.099	SU01-145	64.75	27.16	21.72	13.9	10.45	17.46	20.19	6.99	2.28	4.05	3.17	14.72	4.46	4.14	16.56	16.95	12.14	6.11	6.29	18.93	16.1	14.79	15.96	18.95	6.68	15.9789	20.9412	17.49	40	39	7	6	5	5	14	24	3	1	3	7	6	7	2
Guyanancistrus brevispinis orientalis			GbApp	GF, Saut Mapaou, bas Approuague	MNHN		134	53.2	42.2	27.8	21.8	35.5	39.9	15	5	6.8	5.7	27.8	8.5	8.5	33.7	36.6	24	11.6	15.7	43.5	33.9	30.5	34.9	39.4	14.8	34.8	42.1	36	68	64	7	6	5	5	14	26	3	1	3	8	5	7	1.5
Guyanancistrus brevispinis orientalis			GbApp	GF, Saut Mapaou, bas Approuague	MNHN		152	51.5	46.6	30.9	23.8	39.9	46.3	16	5.3	6.9	7.3	33.4	9.6	9.6	36.4	40.1	30.7	14.1	20.4	51	36.7	30.7	38.4	44	15.7	39.5	47.8	38.8	72	62	7	6	5	5	14	26	3	1	3	8	5	7	1.5
Guyanancistrus brevispinis orientalis			GbApp	GF, crique Arataye, haut Approuague	MHNG 2662.089	GF03-150	36.19	16.33	13.26	8.31	6.06	10.14	11.46	3.79	1.67	2.52	2.27	8.04	2.33	2.75	9.10885	8.65	5.97	3.26	3.63	9.6	9.7	8.44	8.11	9.85	3.66	8.56665	12.4792	9.5	35	32	7	6	5	5	14	24	3	1	3	7	6	7	2
Guyanancistrus brevispinis orientalis			GbApp	GF, crique Arataye, haut Approuague	MHNG 2662.089	GF03-149	45.57	20.42	16.45	10.24	7.35	12.3	13.88	4.79	2.11	3.11	2.7	10.07	3.01	3.42	10.66	10.73	8.29	3.63	4.13	11.54	11.47	10.21	10.5	12.41	4.5	11.0011	15.2584	12.06	42	44	7	6	5	5	14	24	4	1	3	7	6	7	2
Guyanancistrus brevispinis orientalis			GbApp	GF, crique Arataye, haut Approuague	MHNG 2662.092	GF03-167	52.67	23.2	18.92	11.65	8.67	14.65	16.74	5.72	1.96	3.63	3.05	12.55	3.4	3.59	13.72	13.95	9.14	4.57	5.02	14.42	13.06	11.13	12.93	14.99	5.54	13.62	17.362	13.72	45	44	7	6	5	5	14	24	3	1	3	8	6	7	2
Guyanancistrus brevispinis orientalis			GbApp	GF, crique Arataye, haut Approuague	MHNG 2662.089	GF03-152	62.02	26.18	20.92	12.97	10.52	17.49	19.26	6.76	2.17	4.13	3.2	13.95	4.17	4.4	15.17	16.8	10.6	6.01	6.01	18.21	15.33	14.17	14.87	18.71	6.41	15.2704	20.4	16.53	47	44	7	6	5	5	14	24	3	1	3	8	6	6	1
Guyanancistrus brevispinis orientalis			GbApp	GF, crique Arataye, haut Approuague	MHNG 2791.090	GF03-185	70.04	29.54	23.01	14.44	11.79	19.8	22.19	7.67	2.23	4.3	3.68	15.9	4.7	4.85	17.1596	18.02	13.75	6.57	7.04	20.14	18.13	15.68	16.34	21.8	7.61	18.26	22.86	18.73	48	43	7	6	5	5	14	24	3	1	3	8	6	6	2
Guyanancistrus brevispinis orientalis			GbApp	GF, crique Arataye, haut Approuague	MHNG 2662.092	GF03-166	92	36.75	28.72	18.83	14.23	24.22	27.7	10.24	3.21	5.05	4.67	19.95	6.36	5.95	22.65	23.89	17.14	7.87	10.49	27.47	23.1	20.17	22.16	27.88	9.11	23.0512	29.64	22.86	50	47	7	6	5	5	14	24	4	1	3	8	6	6	2
Guyanancistrus brevispinis orientalis			GbApp	GF, crique Arataye, haut Approuague	MHNG 2662.095	RV07-16	94.91	38.5	30.13	19.75	14.37	24.8	27.89	10.66	2.66	5.33	5.04	19.58	6.47	6.08	22.7	23.36	17.62	8.6	9.55	28.83	22.27	23.2	23.08	29	8.69	23.45	29.88	24.46	57	58	7	6	5	5	14	23	3	1	3	7	7	7	2.5
Guyanancistrus brevispinis orientalis			GbApp	GF, crique Arataye, haut Approuague	MHNG 2662.094	GF03-184	96.84	40.08	31.13	20.14	15.85	25.79	30.32	10.82	3.42	5.91	5.2	21.39	6.52	6.56	23.56	24.47	18.44	8.69	8.94	28.73	24.21	21.15	23.99	27.71	9.86	24.44	31.64	26.22	55	54	7	6	5	5	14	24	3	1	3	8	6	7	2.5
Guyanancistrus brevispinis orientalis			GbApp	GF, crique Arataye, haut Approuague	MHNG 2480.046		103.73	41.53	31.99	20.39	16.35	28.28	31.96	12.34	3.09	5.64	5.81	22.06	6.61	6.8	25.83	28.65	18.34	10.53	12.86	30.71	25.7	21.62	25.33	32.14	10.74	22.91	30.36	25.58	52	50	7	6	5	5	14	24	3	1	3	8	5	8	1.5
Guyanancistrus brevispinis orientalis			GbApp	GF, crique Arataye, haut Approuague	MHNG 2522.072		118.8	47.2	35.4	22.6	17.5	31	34.6	12.8	3.22	6.2	5.4	25.02	7.2	7.2	28.25	31.56	23.1	10.2	15.4	34.1	28.1	29.2	28.3	35	11.4	30.0067	35	29.1	62	57	7	6	5	5	14	25	3	1	3	7	6	7	2
Guyanancistrus brevispinis orientalis			GbOya	GF, face Roche mon Père, haut Oyapock	MHNG 2681.098	GF06-182	33.42	15.15	12.58	7.76	5.4	9.13	10.28	3.65	1.54	2.31	2.1	8.22616	2.15	2.35	7.98	7.54	5.23	3.31	3.22	8.77	8.2	7.85156	7.22	9.82	3.35	9.11804	11.28	8.22	31	37	7	6	5	5	14	24	3	1	3	7	6	7	2
Guyanancistrus brevispinis orientalis			GbOya	GF, face Roche mon Père, haut Oyapock	MHNG 2681.098	GF06-183	114.6	44.95	35.23	23.14	17.17	30.02	33.98	12.24	3.81	6.4	5.91	23.49	7.85	7.88	29.31	29.11	23.43	10.32	14.27	34.32	29.08	25.38	28.83	34.62	11.68	30.17	36.75	30.07	48	48	7	6	5	5	14	24	3	1	3	7	6	7	2
Guyanancistrus brevispinis orientalis			GbOya	GF, Crique Gabaret, bas Oyapock	MHNG 2723.012		32.22	14.7	12.18	7.2	5.38	8.81	10.16	3.64	1.4	2.17	1.95	7.49	1.93	2.26	7.22	7.23	5.16	2.91	2.77	8.61	7.96	7.64	6.76	9.07	3.19	8.96307	11.04	8.17	31	32	7	6	5	5	14	24	3	1	3	8	6	6	2
Guyanancistrus brevispinis orientalis			GbOya	GF, Crique Gabaret, bas Oyapock	MHNG 2723.012		39.17	17.06	14.22	8.46	6.48	10.85	12.15	4.35	1.45	2.63	1.79	9.04	2.36	2.51	9.34862	9.41	6.63	3.62	3.51	10.79	9.84	9.17	8.78	12.17	3.92	10.19	13.48	9.99	31	39	7	6	5	5	14	24	2	1	3	7	6	7	2.5
Guyanancistrus brevispinis orientalis			GbOya	GF, Crique Gabaret, bas Oyapock	MHNG 2723.012		44.32	20.5	16.6	10.1	7.84	12.73	14.37	5	1.77	3.48	2.39	11.09	3.3	3.26	11.23	10.02	7.58	3.88	4.35	13.21	11.56	10.79	9.87	12.36	4.38	13.2	17.47	11.98	34	33	7	6	5	5	14	24	3	1	3	7	7	6	2
Guyanancistrus brevispinis orientalis			GbOya	GF, Crique Minette, bas Oyapock	MHNG 2723.013	GF99-179	56.62	24.2	19.24	11.66	9.31	15.74	17.55	5.84	2.03	3.63	2.79	12.15	3.67	3.8	13.31	13.75	9.88	5.09	4.83	16.1409	12.99	12.44	13.29	16.43	5.67	14.8248	18.52	14.24	53	55	7	6	5	5	14	24	3	1	3	7	6	7	2
Guyanancistrus brevispinis orientalis			GbOya	GF, Crique Minette, bas Oyapock	MHNG 2723.013	GF99-178	76.47	32.09	25.58	16.64	12.84	21.12	24.32	8.69	2.56	4.46	3.81	17.54	5.32	5.1	19.04	19.36	13.12	6.29	7.38	21.9	18.36	16.57	17.86	22.33	7.89	19.5936	27.07	21.03	56	50	7	6	5	5	14	24	3	1	3	8	5	7	2
Guyanancistrus brevispinis orientalis			GbOya	GF, Crique Minette, bas Oyapock	MHNG 2723.013	GF99-200	90.45	37.42	29.89	19.37	14.82	24.52	27.4	10.44	3.02	5.03	4.53	20.17	6.19	6.04	22.2653	22.96	16.64	6.96	8.55	25.38	21.37	19.38	22.36	26.47	8.38	21.08	28.97	23.43	33	32	7	6	5	5	14	24	3	1	3	7	6	7	2
Guyanancistrus brevispinis orientalis			GbOya	GF, Crique Minette, bas Oyapock	MHNG 2723.013		93.24	38.28	30.21	19.75	14.06	24.69	27.41	9.96	2.95	5.25	4.82	20.01	6.29	6.73	22.43	22.38	16.57	8.12	8.44	26.29	22.06	21.5	21.89	27.77	8.7	22.82	30	24.43	40	35	7	6	5	5	14	24	2	1	3	7	6	6	1.5
Guyanancistrus brevispinis orientalis			GbOya	GF, Crique Minette, bas Oyapock	MHNG 2723.013	GF99-199	98.92	42.42	32.8	21.8	15.99	26.62	30.61	10.77	3.48	5.57	4.66	21.35	7.37	6.91	24.06	26.5	17.3	7.35	9.92	28.92	23.05	21.22	23.43	29.63	9.34	24.59	30.37	26.24	37	36	7	6	5	5	14	24	3	1	3	8	6	7	2
Guyanancistrus brevispinis orientalis			GbOya	GF, Crique Gabaret, bas Oyapock	MHNG 2723.012		104.15	42.13	33.47	21.23	16.12	27.67	31.94	11.01	3.1	5.78	5.27	23.29	7.28	7.12	27.21	25.93	18.35	8.46	11.79	32.21	25.92	24.84	25.07	30.13	10.18	27.63	33.09	28.57	45	46	7	6	5	5	14	24	3	1	3	8	6	6	1.5
Guyanancistrus brevispinis orientalis			GbOya	GF, Crique Gabaret, bas Oyapock	MHNG 2723.012		122.13	49.92	38.28	24.74	19.5	31.95	37.22	13.85	4.07	6.61	5.94	25.26	8.09	7.66	29.56	29.87	25.37	8.31	15.83	37.6	29.01	26.9	29.33	36.29	11.57	31.36	38.25	31.44	50	51	7	6	5	5	14	24	3	1	3	7	7	6	2
Guyanancistrus teretirostris			Gsp1	BR, 4 frères, affluent du Paru de Oeste	MHNG 2723.004	653	86.95	34.64	27.54	17.95	13	23.52	26.58	9.89	2.72	4.43	4.97	19.18	5.36	4.98	20.23	20.77	16.88	7.4	8.84	23.79	18.71	20.97	20.97	25.7	9.42	20.64	26.01	23.21	47	36	7	6	5	4	14	25	3	1	3	7	7	7	2.5
Guyanancistrus teretirostris			Gsp1	BR, 4 frères, affluent du Paru de Oeste	MHNG 2723.004	652	97.5	39.83	30.87	20.25	13.44	25.37	28.9	11.26	3.26	4.83	5.08	20.76	6.24	6.25	22.4	24.25	18.11	7.12	10.72	27.73	21.96	22.3	23.96	28.61	10.19	22.82	29.37	25.5	48	45	7	6	5	5	14	25	3	1	3	8	6	6	3
Guyanancistrus teretirostris			Gsp1	BR, 4 frères, affluent du Paru de Oeste	MHNG 2723.004	654	97.63	40.47	31.54	20.79	14.98	26.66	30.4	11.75	3.4	4.92	5	21	6.34	6.7	22.97	24.51	17.36	8.2	11.03	29	22.94	22.2	22.93	29.99	10.25	23.37	30.63	27.64	37	40	7	6	5	5	14	25	3	1	4	7	6	8	2
Cryptancistrus similis			Gsp2	BR, 4 frères, affluent du Paru de Oeste	MHNG 2723.005	672	61.91	26.84	21.57	12.72	10.27	17.95	20.32	7.85	2.62	4.19	3.6	12.88	3.98	3.79	15.96	16.1	10.3	5.46	6.07	17.42	15.71	15.94	14.8	17.71	7.12	15.5286	19	17.46	51	53	7	6	5	5	14	24	3	1	3	8	6	6	0.5
Guyanancistrus tenuis			Gsp3	GF, Mitaraka, crique affluente b. Jari	MNHN 2002-3537		33.2	15.03	11.9	6.91	4.8	9.02	10.05	3.71	1.34	2.18	1.82	7.63	1.91	1.94	7.66	6.86	6.2	2.75	3.2	8.9	8.07	8.41	6.92	10.03	3.12	9.16509	11.108	8.04613	38	42	7	6	5	5	14	24	3	1	5	7	7	7	3.5
Guyanancistrus tenuis			Gsp3	GF, Mitaraka, crique affluente b. Jari	MNHN 2002-3537		38.49	16.51	13.18	7.91	5.71	10.25	11.48	4.36	1.57	2.6	2.26	8.78	2.16	1.99	9.25	8.2	7.06	3.17	4.17	10.16	9.86	9.08	8.13	12.01	3.55	10.39	12.4993	9.69	57	47	7	6	5	5	14	25	3	1	4	7	6	7	3
Guyanancistrus tenuis			Gsp3	GF, Mitaraka, crique affluente b. Jari	MNHN 2002-3537		41.86	18.64	14.68	8.74	5.95	11.48	13.25	4.59	1.5	2.66	2.43	9.62	2.51	2.66	9.46	9.24	7.94	3.61	4	11.24	10.83	10.01	9.1	13.44	3.96	11.25	13.3856	10.89	45	54	7	6	5	5	14	24	3	1	5	7	6	8	3
Guyanancistrus tenuis			Gsp3	GF, Mitaraka, crique affluente b. Jari	MNHN 2002-3537		52.1	22.32	17.55	10.98	7.29	14.04	15.88	5.54	1.82	3.18	2.87	11.28	3.23	3.22	12.75	12.26	10.66	4.32	5.44	14.36	13.6	12.75	11.36	16.34	4.87	13.54	14.91	12.88	58	68	7	6	5	5	14	25	3	1	5	7	7	7	4
Guyanancistrus tenuis			Gsp3	GF, Mitaraka, crique affluente b. Jari	MNHN 2002-3537		57.36	23.63	18.4	11.2	7.97	14.96	17.07	6.16	1.76	3.34	3	11.72	2.98	3.1	14.01	12.66	11.05	4.81	5.69	15.19	13.87	14.6	12.75	16.85	5.37	14.57	17.4623	14.5	43	51	7	6	5	5	14	26	3	1	5	7	7	7	3
Guyanancistrus tenuis			Gsp3	GF, Mitaraka, crique affluente b. Jari	MNHN 2002-3537	GF Mit 02	59.31	24.24	19.08	11.82	8.51	15.86	17.75	6.32	1.84	3.52	3.39	12.19	3.25	3.84	13.63	12.9	11.83	4.62	5.74	15.88	14.8	14.5	13	18.89	5.51	14.98	18.9	14.42	57	65	7	6	5	5	14	24	3	1	5	7	7	7	3.5
Guyanancistrus tenuis			Gsp3	GF, Mitaraka, crique affluente b. Jari	MNHN 2002-3537		62.49	26.15	20.74	12.78	8.88	16.98	18.96	6.72	2.2	3.59	3.34	13.26	3.28	3.56	15.57	14.39	12.15	5.04	6.43	17.52	15.31	15.87	14.29	19.17	5.98	15.9519	18.8115	16.2	34	38	7	6	5	5	14	25	3	1	3	7	6	8	3
Guyanancistrus tenuis			Gsp3	GF, Mitaraka, crique affluente b. Jari	MNHN 2002-3537		64.65	26.49	20.34	12.5	9.13	17.04	19.68	7.03	2.09	3.51	3.49	13.79	3.35	3.58	15.69	14.76	13.12	5.54	6.51	17.47	15.68	17.13	14.51	20.47	5.95	16.13	19.3796	16.02	39	33	7	6	5	5	14	25	3	1	4	7	6	8	3.5
Guyanancistrus tenuis			Gsp3	GF, Mitaraka, crique affluente b. Jari	MNHN 2002-3537		67.32	26.64	21.36	13.1	9.48	18.17	20.42	7.1	1.95	3.81	3.59	14.61	3.54	3.76	17.01	15.77	13.84	5.65	7.08	18.38	17.53	18.04	15.22	20.17	6.17	17.61	20.5	17.01	43	50	7	6	5	5	14	24	3	1	4	7	7	6	3.5
Guyanancistrus tenuis			Gsp3	GF, Mitaraka, crique affluente b. Jari	MNHN 2002-3537	GF Mit 03	71.39	29.42	22.81	13.66	9.61	18.58	21.43	7.64	2.26	4.01	3.18	14.85	3.97	4.01	18.04	16.77	15.26	5.7	7.13	19.51	17.64	17.97	16.83	23.17	6.43	18.21	21.1523	18.65	46	54	7	6	5	5	14	25	3	1	4	7	7	7	3.5
Guyanancistrus tenuis			Gsp3	GF, Mitaraka, crique affluente b. Jari	MNHN 2002-3537		74.9	30.91	23.78	14.3	10.21	20.53	23.03	7.68	2.58	4.24	3.37	15.27	4.12	4.34	18.19	18.32	16.14	6.01	7.5	21.04	19.48	19.64	17.71	24.53	7.1	19.04	23.17	20.26	42	48	7	6	5	5	14	24	4	1	4	7	6	8	4
Guyanancistrus tenuis			Gsp3	GF, Mitaraka, crique affluente b. Jari	MNHN 2002-3537		81.08	32.9	25.43	15.97	11.16	22.27	24.98	9.08	2.67	4.3	4.16	16.54	4.5	4.35	19.73	19.14	16.47	7	8.33	21.69	19.09	20.01	19.98	24.47	7.73	20.66	22.73	21.96	36	35	7	6	5	5	14	25	3	1	5	7	7	6	3
Guyanancistrus tenuis			Gsp3	GF, Mitaraka, crique affluente b. Jari	MNHN 2002-3537	GF Mit 04	82.12	32.1	25.32	15.94	11.3	21.39	24.28	8.78	2.66	4.43	3.97	17.56	4.39	4.45	20.21	19.09	17.45	6.44	9.07	22.06	20.12	20.85	18.89	25.78	7.74	19.88	23.86	21.23	54	45	7	6	5	5	14	25	3	1	4	7	7	7	3.5
Guyanancistrus tenuis			Gsp3	GF, Mitaraka, crique affluente b. Jari	MNHN 2002-3537	GF Mit 05	89.8	36.28	27.95	17.1	12.44	22.25	25.08	9.62	3.46	4.89	4.44	18.14	5.48	5.44	19.91	20.4	18.28	6.32	8.19	23.38	21.19	21.32	20.27	28.43	8.05	22.58	25.37	22.61	29	31	7	6	5	5	14	24	3	1	5	7	7	6	3.5
Guyanancistrus tenuis			Gsp3	GF, Mitaraka, crique affluente b. Jari	MNHN 2002-3537	GF Mit 06	90.92	36.55	28.55	18.41	12.26	23.6	26.75	9.83	3.26	4.76	4.43	19.2	5.87	6.02	21.19	20.73	18.85	5.76	9.65	24.92	22.27	22.94	21.39	27.4	8.13	22.19	26.73	24.09	38	35	7	6	5	5	14	23	3	1	5	7	6	7	3.5
Guyanancistrus megastictus			Gsp4	GF, Mitaraka, Alama, Maroni	MNHN 2002-3508 A		57.35	23.16	18.13	11.1	7.92	16.22	18.16	6.66	2.03	3	3.66	12.49	3.04	3.23	13.95	13.08	11.31	5.14	6.54	16.17	14.04	13.61	12.84	18	5.95	14.74	19.42	15.5	54	57	7	6	5	5	14	23	3	1	4	7	6	7	3
Guyanancistrus megastictus			Gsp4	GF, Mitaraka, Alama, Maroni	MNHN 2002-3508 B	MIT-01	62.73	26.35	20.32	12.79	9.46	18.17	20.49	7.56	2.43	3.37	3.68	14.15	3.41	3.54	16.36	15.07	12.45	5.98	6.28	17.64	16.5	15.94	15.29	19.46	6.82	17.17	20.97	17.89	45	48	7	6	5	5	14	24	3	1	4	7	6	8	2.5
Guyanancistrus nassauensis			GBM	SU, Paramakka Kreek, Maroni	AUM 50740	JWA109	37.17	16.54	13.57	8.47	6.61	11.37	13.09	4.38	1.33	2.33	2.11	9.44	3.29	3.52	8.7	10.18	5.98	3.82	3.08	9.21	7.44	9.26	8.95	10.13	4.3	8.66	11.8397	10.26	52	58	7	6	5	4	14	25	3	1	3	8	5	7	2
Guyanancistrus nassauensis			GBM	SU, Paramakka Kreek, Maroni	AUM 50740		42.84	18.6	14.87	9.65	7.46	12.75	14.61	5.11	1.43	2.45	2.68	11.2	3.68	3.78	10.24	11.02	7.39	4	4.05	11.16	9.58	9.97	9.98	12.07	5.26	10.45	12.66	11.72	69	67	7	6	5	4	14	25	3	0	3	8	6	6	2.5
Guyanancistrus nassauensis			GBM	SU, Paramakka Kreek, Maroni	AUM 50740	JWA107	46.97	20.46	15.92	10.2	7.95	13.17	15.28	4.87	1.48	2.57	2.61	11.53	4.16	4.39	10.4	11.83	8.49	4.56	3.68	11.43	9.74	10.44	10.67	13.81	5.21	10.31	14.4205	12.66	77	65	7	6	5	4	14	25	4	1	3	8	7	6	3.5
Guyanancistrus nassauensis			GBM	SU, Paramakka Kreek, Maroni ("Ijkreek")	AUM 50388		49.72	22.04	17.48	11.49	8.26	13.72	16	5.32	1.61	2.74	2.5	12.13	5.03	4.91	11.03	11.93	9.73	3.55	4.24	12.63	11.41	11.41	11.57	15.03	5.21	12.14	15.81	12.9	53	45	7	6	5	4	14	24	4	0.5	3	7	7	6	2.5
Guyanancistrus nassauensis			GBM	SU, Paramakka Kreek, Maroni ("Ijkreek")	AUM 50388		44.04	19.49	15.67	10.17	7.27	13.45	15.35	4.95	1.48	2.37	2.59	11.34	4.68	4.61	9.17	11.21	7.53	4.03	3.65	10.94	10.09	10.09	10.48	12.34	4.81	10.83	13	12.55	54	53	7	6	5	4	14	24	3	0.5	3	8	6	6	3
Guyanancistrus nassauensis			GBM	SU, Paramakka Kreek, Maroni ("Ijkreek")	AUM 50388		41.58	18.55	14.91	9.95	6.75	12.33	14.34	4.61	1.57	2.25	2.34	11	4.16	4.43	8.29	9.79	7.45	3.73	3.22	9.69	9.05	9.14	9.82	11.28	4.53	9.66	13.31	11.01	57	59	7	6	5	4	14	24	3	1	3	7	7	7	3
Guyanancistrus nassauensis			GBM	SU, Paramakka Kreek, Maroni ("Ijkreek")	AUM 50388		33.17	15.11	12.52	7.95	5.67	10.07	11.38	3.93	1.35	2	2.15	8.7	3.5	3.87	7.35	7.62	5.63	2.8	2.49	7.75	7.75	7.79	7.53	9.44	3.76	8.07438	11.36	9	57	55	7	6	5	4	14	24	3	1	3	8	6	6	3
Guyanancistrus nassauensis			GBM	SU, Paramakka Kreek, Maroni ("Ijkreek")	AUM 50388		35.08	15.56	12.96	8.44	5.86	10.75	12.18	4.14	1.31	2.12	2.1	9.09	3.35	3.59	7.71	8.6	5.87	3.09	2.81	8.52	7.77	8.22	7.74	9.88	4.21	8.34	11.2893	9.55	56	54	7	6	5	4	14	24	2	1	3	7	6	7	2.5
Guyanancistrus nassauensis			GBM	SU, Paramakka Kreek, Maroni ("Ijkreek")	AUM 50388		38.06	17.21	14.05	9.04	6.53	11.51	13.28	4.34	1.44	2.44	2.14	9.63	3.88	3.8	8.56	9.25	6.39	3.73	3.23	9.58	8.86	8.29	8.39	11.26	4.36	9.05004	12.54	10.42	67	61	7	6	5	4	14	25	3	1	3	8	5	7	2.5
Guyanancistrus nassauensis			GBM	SU, Paramakka Kreek, Maroni ("Ijkreek")	AUM 50388		28.34	13.18	11.14	6.96	4.92	8.76	9.98	3.53	1.08	1.8	1.74	7.5	2.9	3.08	6.19	6.17	3.84	2.85	2.1	7.02	6.81	6.83	5.8	8.08	3.31	7.11069	9.51431	7.83	55	57	7	6	5	4	14	24	3	1	3	7	7	7	2
Guyanancistrus nassauensis			GBM	SU, Paramakka Kreek, Maroni ("Ijkreek")	AUM 50388		22.94	10.5	9.33	5.62	4.16	6.8	7.83	2.91	0.85	1.58	1.6	5.93	2.29	2.37	4.59	5.08	3.21	1.93	1.98	5.1	5.1	5.1	4.76	6.21	2.75	6.03326	7.64	5.71	50	53	7	6	5	4	14	24	3	1	3	7	6	7	2.5
Guyanancistrus nassauensis			GBM	SU, Paramakka Kreek, Maroni	MHNG 2679.100	SU01-383	28.93	13.61	11.64	7.37	5.08	9.02	10.51	3.54	1.01	1.88	1.55	8.42	3.16	3.17	6.15494	6.74	4.21	2.69	2.28	6.49	6.56	6.96	6.34	7.64	3.4	7.39	9.25	7.95	65	54	7	6	5	4	14	24	3	1	3	7	6	7	2.5
Guyanancistrus nassauensis			GBM	SU, Paramakka Kreek, Maroni	MHNG 2679.100	SU01-383	41.36	18.51	15.21	9.71	6.64	12.3	14.21	4.65	1.41	2.42	2.29	11.41	4.3	4.45	8.87	10.01	6.74	3.68	3.49	9.95	9.53	9.76	9.56	11.55	4.73	10.8	13.99	11.09	69	59	7	5	5	4	14	24	2	0	3	7	6	6	2.5
Guyanancistrus nassauensis			GBM	SU, Paramakka Kreek, Maroni	MHNG 2679.100	SU01-383	42.44	18.54	15.1	9.66	7.05	12.66	14.5	4.45	1.45	2.7	2.4	11.24	4.31	4.63	9.32	10.23	6.73	3.92	4.36	10.82	10.31	9.73	9.6	11.26	4.68	9.92395	14.59	11.43	47	47	7	6	5	4	14	24	2	0	3	7	6	6	2.5
Guyanancistrus nassauensis			GBM	SU, Paramakka Kreek, Maroni	MHNG 2679.099	MUS 299	34.66	15.78	13.11	8.46	6.05	11.07	12.67	4.16	1.26	2.22	2.31	10	3.77	3.77	7.61	8.72	6.52	3.20104	3.37	8.33575	8.46	7.72	8.49	11.28	4.06	8.37167	11.1787	9.88	49	57	7	6	5	4	14	25	2	1	3	7	6	7	2.5
Guyanancistrus nassauensis			GBM	SU, Paramakka Kreek, Maroni	AUM 50737		35.72	16.1	13.48	8.48	6.41	11.21	12.73	4.25	1.38	2.22	2	9.51	3.63	3.6	7.67	8.71	5.5	3.56	2.98	9.02	8.61	8.48	8.07	9.73	4.51	7.74	11.4578	9.9	60	63	7	6	5	4	14	24	3	0	3	7	6	7	2
Guyanancistrus nassauensis			GBM	SU, Paramakka Kreek, Maroni	AUM 50737	JWA106	50.1	20.95	16.69	10.78	8.93	14.82	17.57	5.25	1.48	2.87	2.71	12.84	4.8	5.03	11.59	12.83	8.62	4.49	4.38	12.69	11.84	10.88	12.15	14.41	5.85	12.42	15.2448	13.85	79	67	7	6	5	4	14	24	3	1	3	8	6	6	2.5
Guyanancistrus nassauensis			GBM	SU, Paramakka Kreek, Maroni	AUM 50396	JWA40	49.6	20.85	16.71	10.78	8.04	13.78	16.43	4.87	1.37	2.76	2.83	12.43	5.33	5.24	10.76	12.2	8.83	4.56	4.83	11.54	10.82	10.92	11.53	14.33	5.25	12.14	15.1131	12.96	47	52	7	6	5	5	14	25	3	1	3	8	6	6	3
Guyanancistrus nassauensis			GBM	SU, Paramakka Kreek, Maroni	AUM 50763	7378	60.97	24.55	19.63	12.69	10.17	17.44	20.15	6.59	2.04	3.19	3.07	15.5	5.22	5.38	13.87	15.77	12.44	5.61	6.3	16.04	14.63	13.14	14.76	17.66	7.19	12.64	17.39	15.95	59	52	6	6	5	4	14	25	3	0	3	7	7	6	3
Guyanancistrus nassauensis			GBM	SU, Paramakka Kreek, Maroni	AUM 50396		38.79	17.2	14.47	8.99	6.84	10.91	12.98	4.45	1.54	2.25	3.37	10.26	3.86	3.86	8.42	9.19	6.77	3.67	3.38	9.47	8.45	8.62	8.2	10.34	4.46	8.17	11.62	10.16	65	66	7	6	5	4	14	24	4	0	3	8	6	6	2
Guyanancistrus nassauensis			GBM	SU, Paramakka Kreek, Maroni	AUM 50396		41.15	18	14.52	9.2	7.14	11.48	13.62	4.69	1.58	2.41	3.03	10.63	4.02	3.91	8.47	9.47	7.53	3.91	3.48	10.23	9.28	9.45	9.46	11.3	4.99	10.47	11.85	10.41	49	47	8	6	5	4	14	23	4	0	4	7	6	7	3
Guyanancistrus nassauensis			GBM	SU, Paramakka Kreek, Maroni	AUM 50396		44.34	19.55	16.59	10.87	7.17	12.23	14.93	5.05	1.67	2.7	3.02	11.9	4.88	4.58	9.21	9.91	6.8	3.86	3.19	10.04	9.92	9.58	9.85	12.87	4.85	10.303	13.9	10.82	44	43	7	6	5	4	14	24	3	0	2	7	6	7	2.5
Guyanancistrus nassauensis			GBM	SU, Paramakka Kreek, Maroni	AUM 50396		45.88	20.26	16.75	10.88	7.8	13.38	15.71	5.4	1.63	2.84	2.94	12.08	5.09	4.98	10.1154	10.47	8.09	3.79	3.49	11.11	9.75	9.87	10.56	13.75	5.2	8.79	14.1335	11.73	48	49	7	6	5	4	14	24	3	0	3	7	6	7	3.5
Guyanancistrus brownsbergensis			Gkoem	SU, Koemboe Creek, Saramacca		JM14 03	49.22	20.97	16.53	10.13	7.71	14.22	15.53	6.33	1.71	2.81	2.5	11.46	3.27	3.5	11.97	11.37	9.57	3.91	5.91	13.62	12.31	12	10.75	13.96	5.7	13.14	16.38	12.96	43	45	7	6	5	5	14	24	3	1	3	7	7	7	3.5
Guyanancistrus brownsbergensis			Gkoem	SU, Koemboe Creek, Saramacca		JM14 02	55.44	22.98	18.38	11.56	8.71	15.9	17.57	6.88	1.95	2.91	2.81	13.18	3.65	3.9	14.2	13.61	11.57	4.49	6.64	16.48	14.8	13.2	12.53	16.11	6.43	15.08	18.66	15.08	35	40	7	6	5	5	14	25	3	1	3	7	7	7	3
Guyanancistrus brownsbergensis			Gkoem	SU, Koemboe Creek, Saramacca		JM14 01	63.83	26.81	21.29	13.41	9.73	17.94	20.1	7.74	2.28	3.22	3.44	14.52	4.43	4.96	17.208	14.93	12.76	5.02	8.14	18.32	16.7	14.45	14.75	17.9	7.25	16.86	19.56	16.77	46	45	7	6	5	5	14	25	3	1	3	7	7	7	3
Guyanancistrus longispinis			Glon	GF, Oyapock	MHNG 2752.035		33.9	14.91	12.45	6.92	5.99	10.33	11.51	3.99	1.51	2.87	1.79	7.57	2.08	2.16	10.24	10.28	4.45	3.18	3.79	10.8	8.67	8.65	7.57	9.66	4.08	9.00924	12.4	9.64	29	30	7	6	5	5	14	24	2	1	3	9	5	6	0
Guyanancistrus longispinis			Glon	GF, Oyapock, Saut Kamalawa	MHNG 2680.049	GF06-111	51.62	22.38	18.47	10.54	8.89	15.58	17.71	5.6	1.64	3.67	2.96	11.75	3.09	3.11	15.52	15.44	7.41	4.52	5.2	18.4	13.92	11.7	12.28	14.55	6.12	12.59	18.17	14.98	42	43	7	6	5	5	14	24	3	1	3	8	6	6	0
Guyanancistrus longispinis			Glon	GF, Oyapock, Saut Kamalawa	MHNG 2680.049	GF06-110	73.32	31.81	25.23	15.43	11.95	22.11	24.46	8.06	2.32	4.89	3.99	15.53	4.66	4.81	21.56	21.65	9.9	6.23	8.05	27.55	20.25	17.2	18.46	21.33	8.69	16.65	25.51	21.67	45	41	7	6	5	5	14	24	2	1	3	9	5	6	0
Guyanancistrus longispinis			Glon	GF, Oyapock, Saut Kamalawa	MHNG2681.074	GF06-176	79.85	35.12	28.14	17.25	13.87	23.44	26.95	8.66	2.44	5.59	5.13	17.48	5.61	5.38	21.96	24.75	11.11	5.68	8.21	31.11	20.6	18.19	19.86	23.46	8.73	18.1631	25.9	23.95	59	51	7	6	5	5	14	25	2	1	3	9	5	6	0
Guyanancistrus longispinis			Glon	GF, Oyapock, Saut Kamalawa	MHNG 2680.049	GF06-109	91.35	39.17	31.2	19.51	14.5	26.21	30.24	10	2.96	5.62	4.78	20	5.99	5.86	23.91	27.19	12.54	6.75	10.01	37.33	24.02	20.72	22.75	25.15	10.31	21.19	30.12	27.25	63	55	7	6	5	5	14	24	2	1	3	8	6	6	0
Guyanancistrus longispinis			Glon	GF, Oyapock, Alicoto	MHNG 2680.100	GF06-022	72.01	31.05	24.74	14.79	13.47	20.93	23.55	7.78	2.13	5.14	4.14	14.31	4.75	4.66	20.92	21.41	10.41	5.64	7.72	28.39	19.14	15.95	17.42	21.38	8.03	16.53	24.45	21.22	51	50	7	6	5	5	14	24	2	1	3	8	5	7	0
Guyanancistrus longispinis			Glon	GF, Oyapock, Alicoto	MHNG 2680.100	GF06-023	84.75	36.69	29.28	17.09	14.69	25.2	28.46	9.32	2.59	5.81	4.31	18.26	5.59	5.23	22.24	24.9	13.97	7.43	7.84	35.58	21.43	17.78	21.41	24.23	9.47	19.1424	24.8	24.98	52	56	7	6	5	2	14	24	2	1	3	8	6	7	2
Guyanancistrus longispinis			Glon	GF, Oyapock, Alicoto	MHNG 2680.100	GF06-002	105.43	45.5	37.28	22.01	16.64	29.67	36.15	10.65	4.06	6.62	6.42	21.46	7.17	6.63	24.91	32.29	16.89	5.73	11.14	44.09	24.3	22.77	25.79	30.2	11.33	25.68	33.37	30.42	65	61	7	6	5	5	14	24	2	1	3	8	7	5	1.5
Guyanancistrus longispinis			Glon	GF, Oyapock, Saut Wacarayou	MHNG 2681.067	GF06-153	77.57	34.6	27.07	16.32	14.06	23.8	26.87	9.15	2.68	5.44	4.25	16.73	4.92	5	21.88	23.01	12.16	6.23	7.86	30.27	19.79	17.46	19.13	22.6	8.78	18.27	25.74	23.41	49	48	7	6	5	4	14	24	2	1	3	8	5	7	1
Guyanancistrus longispinis			Glon	GF, Oyapock, Saut Wacarayou	MHNG 2681.067	GF06-154	84.17	34.89	28.12	17.07	13.75	25.49	28.3	8.92	2.92	5.12	4.42	17.82	5.35	5.42	21.39	25.14	12.56	5.72	8.43	31.92	21.28	18.95	20.64	25.63	9.5	19.64	27.89	23.27	44	43	7	6	5	3	14	24	2	1	3	8	6	6	0
Guyanancistrus longispinis			Glon	GF, Oyapock, Saut Wacarayou	MHNG 2681.067	GF06-152	90.49	37.33	30.02	17.86	14.55	26.23	29.36	10.06	2.93	5.59	5.2	19.57	5.57	5.79	23.66	26.26	13.38	7.21	9.16	33.64	22.13	18.56	21.2	27.58	9.23	18.44	29.305	25.3	42	41	7	6	5	5	14	25	2	1	3	8	6	7	1.5
Guyanancistrus longispinis			Glon	GF, Oyapock, crique Gabaret	MHNG 2725.100	GF99-208	70.04	31.53	25.84	15.7	11.77	21.73	24.08	8.24	2.37	4.78	3.99	14.53	5.15	5.13	19.78	21.11	10.11	5.67	7.41	27.66	18.56	16.25	15.9	20.02	7.47	17.41	23.62	20.23	59	53	7	6	5	5	14	24	2	1	3	8	5	7	0
Guyanancistrus longispinis			Glon	GF, Oyapock, crique Gabaret	MHNG 2725.100	GF99-213	76.05	33.03	26.31	15.76	13.19	23.42	25.89	8.96	2.14	4.04	3.8	15.7	4.73	4.63	21.56	23.55	10.41	6.2	8.34	32.56	19.67	17.11	18.7	21.68	8.51	17.86	27.01	22.95	43	47	7	6	5	5	14	25	2	1	3	8	5	7	0
Guyanancistrus longispinis			Glon	GF, Oyapock, crique Gabaret	MHNG 2725.100	GF99-211	81.63	35.78	28.67	17.39	13.8	24.49	27.78	9.23	2.22	5.42	4.89	18.02	5.65	5.79	22.86	25.72	10.42	6.1	8.53	34.82	20.74	18.14	20.4	23.51	8.18	18.26	27.38	24.42	64	67	7	6	5	5	14	24	2	1	3	8	5	7	0
Guyanancistrus longispinis			Glon	GF, Oyapock, crique Gabaret	MHNG 2725.100	GF99-204	84.32	37.53	29.8	18.25	14.43	25.68	30.28	9.51	2.61	5.69	4.84	18.47	5.87	6.08	22.84	26.48	10.45	6.51	8.8	36.66	21.03	19.53	20.38	23.29	9.12	18.34	27.5364	25.3	59	52	7	6	5	5	14	24	3	1	3	8	5	7	0
Guyanancistrus longispinis			Glon	GF, Oyapock, crique Gabaret	MHNG 2725.100	GF99-210	86.79	38.6	31.15	19.5	15.17	26.77	30.41	9.45	2.91	5.56	4.97	17.92	6.18	6.06	24.59	27.75	12.63	7.06	8.71	39.04	23.22	20	21.13	23.91	9.08	18.45	26.48	26.34	59	64	7	6	5	5	14	24	2	1	3	8	5	7	0
Guyanancistrus longispinis			Glon	GF, Oyapock, crique Gabaret	MHNG 2725.100	GF99-207	92.03	40.71	31.89	20.21	16.29	28.12	31.5	10.19	2.35	5.79	5.29	19.54	5.65	5.78	25.05	28.72	12.35	7.03	9.33	41.83	23.74	20.65	23.73	25.86	9.65	20.75	29.46	27.61	55	54	7	6	5	5	14	24	2	1	3	9	5	6	0
Guyanancistrus longispinis			Glon	GF, Oyapock, crique Gabaret	MHNG 2725.100	GF99-205	94.12	40.47	32.02	19.88	15.66	27.49	31.95	10.68	2.77	5.94	4.41	19.17	5.89	5.93	25.06	28.76	11.91	7.57	9.34	39.92	22.54	21.55	22.45	27.07	9.61	19.02	31.24	28.06	54	50	7	6	5	5	14	24	2	1	3	8	5	7	0
Guyanancistrus niger			Gnig	GF, Oyapock	MHNG 2752.036		83.6	36.06	30.26	19.49	12.52	22.82	27.68	8.44	3.14	5.76	3.98	19.59	6.82	6.72	21.71	20.71	12.13	7.16	7.66	27.8	19.78	18.95	19.05	24.53	7.6	20.89	31.09	22.72	55	44	7	6	5	5	14	24	2	1	3	8	5	7	0.5
Guyanancistrus niger			Gnig	GF, Oyapock	MHNG 2752.036		113.6	49.76	40.68	25.77	20.91	33.53	40.49	13.37	3.98	7.5	5.01	27.66	10.54	9.18	33.53	31.12	17.73	10.1	11	47.87	28.81	26.41	27.72	32.31	11.07	27.88	40.35	32.56	50	42	7	6	5	4	14	24	3	1	3	8	6	7	0.5
Guyanancistrus niger			Gnig	GF, Oyapock, Saut Alexis	MHNG 2727.049	RV-075	146.7	60.22	48.85	31.88	23.85	42.96	49.54	16.28	5.54	8.79	6.11	34.01	11.67	10.6	43.9	39.97	26.5	11.2	14.33	65.39	39.13	32.52	37.7	43.2	14.89		48.78	42.21	47	37	7	6	5	5	14	24	2	1	3	7	6	7	1
Guyanancistrus niger			Gnig	GF, Oyapock, Saut Maripa	MHNG 2753.072	GFSU-1429	154.48	65.19	51.87	34.9	24.63	44.65	54.89	18.48	5.5	8.95	6.49	38.55	13.38	11.63	45.85	44.48	23.37	14.77	15.41	74.09	41.19	34.54	39.38	44.7	15.01	39.4	53.37	42.83	60	51	7	6	5	5	14	24	2	1	3	8	5	7	0
Guyanancistrus niger			Gnig	GF, Oyapock, Roche Mon père	MHNG 2682.037	GF06-295	155.92	66.99	55.25	37.35	25.7	43.51	53.43	18.12	5.23	9.58	6.59	35.38	14.88	13.06	45.44	44.6	22.96	13.55	13.84	70.43	38.12	34.5	40.1	45.88	14.29	39.9	55.89	43.35	53	51	7	6	5	4	14	24	2	1	3	8	5	7	0
Guyanancistrus niger			Gnig	GF, Oyapock, amont Saut Maripa	MHNG 2722.089	GF99-185	160.11	65.18	52.87	34.54	24.73	45.2	55.52	17.99	5.86	9.29	6.96	36.91	13.16	12.24	45.1	41.78	28.44	12.6	15.45	69.46	41.25	39.1	38.29	45.8	15.94	41.92	54.46	43.85	75	57	7	6	5	5	14	24	2	1	3	8	6	6	0.5
Pseudancistrus megacephalus	H		Pmeg	"Surinam" "Surinam.British Guiana"	BMNH 1978.9.12:3		122.8	55.3	47.3	30.1	24.7	38.2	44.6	13.7	4.9	10.5	3.7	27.9	6.9	7.2	36.7	34.8	15.05	8.85	16.8	40	30.8	29.75	30.4	30.8	14.7		33	38.9	37	35	7	6	5	4	14	24	1	0	3	8	5	8	0
Guyanancistrus non megacephalus			Gpot	GY, Potaro River, Essequibo	ZMB 17953		85.8	37.2	31.3	19.7	15.9	26.5	30.3	9.7	3.1	7	2.9	18.7	5.4	5.7	25.6	25.2	12.1	8	11.3	25.9	23.7	21.2	20.3	24.1	9.65	17.7	26.9	25	53	61	7	6	5	4	14	24	2	0	3	8	5	8	0.5
Guyanancistrus non megacephalus			Gpot	GY, Potaro River, Essequibo	MCZ 30196		86	35.6	30.5	18.8	16.3	25.5	29.8	9.2	2.8	6.9	3.1	18.3	5.8	5.9	24.9	23.4	18.2	7.9	10.5	26.7	23.6	21.1	20.3	24.3	9.9		29.7	24.6	84	87	7	6	5	4	14	24	2	0	3	8	5	7	0.5
[truncated: 2 more columns]
